# Supplementary material for: Catalyst-free CO2 hydrogenation with BH3NH3 in water: DFT mechanistic insights
Source: Royal Society of Chemistry journal article supplement (doi:10.1039/d2cp00590e), 2022-01-01
Supplement: d2cp00590e1.pdf [file d2cp00590e1.pdf]

## Supporting Information

### **Catalyst-free CO<sub>2</sub> Hydrogenation with BH<sub>3</sub>NH<sub>3</sub> in Water: DFT Mechanistic Insights**

Zheng-Wang Qu,\* Hui Zhu, Rainer Streubel, Stefan Grimme

DOI:

#### **Table of Contents**

|                                                                                                                       |     |
|-----------------------------------------------------------------------------------------------------------------------|-----|
| <b>Figure S1.</b> DFT-computed free energy paths for S <sub>N</sub> 2 replacement initiated CO <sub>2</sub> reduction | S2  |
| <b>Table S1.</b> DFT-computed energies for CO <sub>2</sub> transfer hydrogenation in water                            | S3  |
| <b>Table S2.</b> DFT-optimized Cartesian coordinates in implicit water solution                                       | S11 |

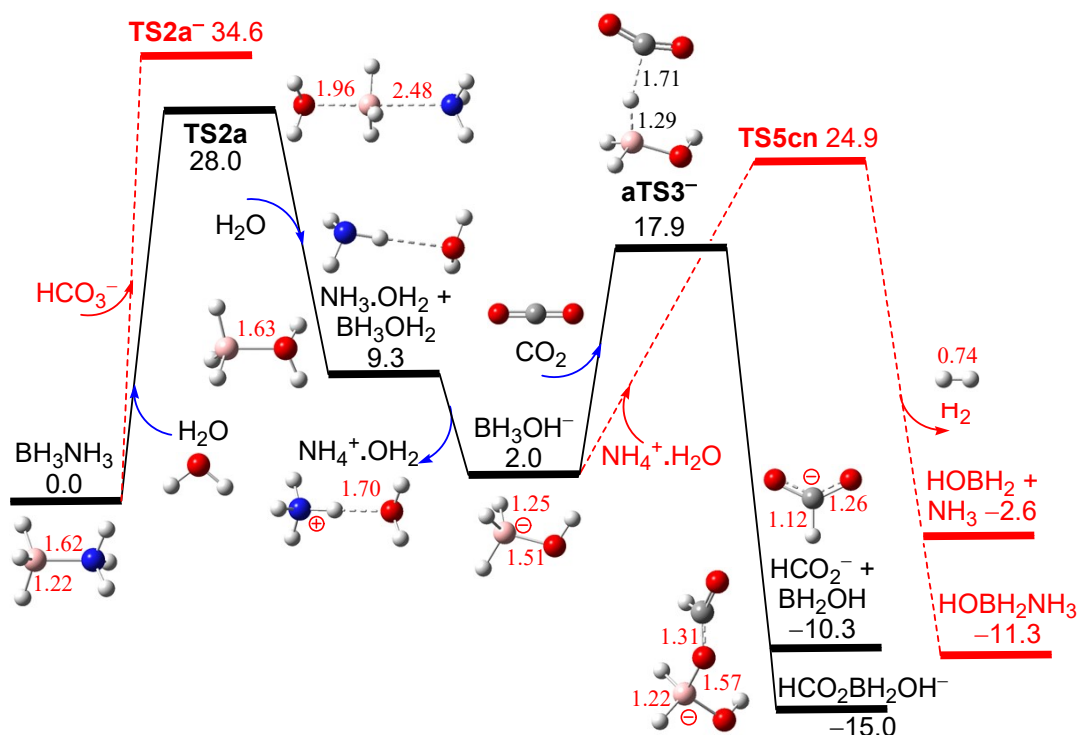

**Figure S1.** DFT computed free energy path (in kcal/mol, at 298 K and 1 M) for the first hydride transfer from  $\text{BH}_3\text{NH}_3$  to  $\text{CO}_2$  in water, initiated by  $\text{S}_{\text{N}}2$  replacement with  $\text{H}_2\text{O}$  or  $\text{HCO}_3^-$ .

Though  $\text{S}_{\text{N}}2$  replacement of  $\text{NH}_3$  group of  $\text{BH}_3\text{NH}_3$  with  $\text{H}_2\text{O}$  is possible over a moderate free energy barrier (via **TS2a**) of 28.0 kcal/mol, direct transfer hydrogenation of  $\text{CO}_2$  with  $\text{BH}_3\text{NH}_3$  is kinetically 2.1 kcal/mol more favourable over a barrier of 25.9 kcal/mol (via **TS2**). Even though, when reductive borate anion such as  $\text{BH}_3\text{OH}^-$  is reached via hydrolysis, hydride transfer to  $\text{CO}_2$  becomes very facile. Moreover, OH-substituted ammonia borane  $\text{HOBH}_2\text{NH}_3$  may also be formed from water hydrolysis, and it turns out to be more reactive than  $\text{BH}_3\text{NH}_3$  for transfer hydrogenation of  $\text{CO}_2$ . These results suggest more efficient hydrogenation of  $\text{CO}_2$  with borate salts and alkoxy-substituted borane ammonia complexes (see Table S1 below).

In contrast,  $\text{S}_{\text{N}}2$  replacement of  $\text{NH}_3$  group of  $\text{BH}_3\text{NH}_3$  with bicarbonate anion  $\text{HCO}_3^-$  is prevented by a high barrier (via **TS2a**<sup>-</sup>) of 34.6 kcal/mol, while transfer hydrogenation of  $\text{HCO}_3^-$  with  $\text{BH}_3\text{NH}_3$  is forbidden over a very high barrier (via **TS2c**<sup>-</sup>) of 47.4 kcal/mol, clearly excluding  $\text{HCO}_3^-$  as the key intermediate for  $\text{CO}_2$  reduction. Similarly,  $\text{S}_{\text{N}}2$  replacement of  $\text{NH}_3$  group of  $\text{BH}_3\text{NH}_3$  with formate anion  $\text{HCO}_2^-$  is prevented by a high barrier (via **TS2b**<sup>-</sup>) of 32.3 kcal/mol, which is kinetically also unfavourable (see Table S1 below).

**Table S1.** DFT-computed energies for the base-assisted hydrogenation of CO<sub>2</sub> with BH<sub>3</sub>NH<sub>3</sub> in water. TPSS-D3/def2-TZVP + COSMO computed imaginary frequency (ImF), zero-point energies (ZPE), enthalpic (Hc) and Gibbs free-energy (Gc) corrections; the COSMO-RS computed solvation enthalpic (Hsol) and Gibbs free-energy (Gsol) corrections in water solution; TPSS-D3/def2-QZVP and PW6B95-D3/def2-QZVP single-point energies (TPSS-D3 and PW6B95 (E<sub>p</sub>)); total PW6B95-D3 Gibbs free energies (G<sub>p</sub> = E<sub>p</sub> + Gc + Gsol), relative electronic energies (ΔE<sub>T</sub> and ΔE<sub>P</sub>) and final Gibbs free-energies (ΔG<sub>T</sub> and ΔG<sub>P</sub>) at the TPSS-D3 and PW6B95-D3 levels. Each structure is labeled either by its molecular formula or a specific name in bold, with singly charged cation and anion species indicated by the + and – superscripts, respectively. Transition structures (with only one imaginary frequency) are indicated by the "TS" prefix. See also main-text figures for structural labelings.

| Reactions in<br>IM water solution                                                                 | ImF<br>cm <sup>-1</sup> | ZPE<br>kcal<br>/mol | Hc<br>kcal<br>/mol | Gc<br>kcal<br>/mol | Hsol<br>kcal<br>/mol | Gsol<br>kcal<br>/mol | TPSS-D3<br>E <sub>h</sub> | PW6B95<br>E <sub>h</sub> | G <sub>p</sub><br>E <sub>h</sub> | ΔE <sub>T</sub><br>kcal<br>/mol | ΔE <sub>P</sub><br>kcal<br>/mol | ΔG <sub>P</sub><br>kcal<br>/mol | ΔG <sub>T</sub><br>kcal<br>/mol |
|---------------------------------------------------------------------------------------------------|-------------------------|---------------------|--------------------|--------------------|----------------------|----------------------|---------------------------|--------------------------|----------------------------------|---------------------------------|---------------------------------|---------------------------------|---------------------------------|
| <i>Water as pure solvent: 2.4 kcal/mol higher free energy due to high concentration</i>           |                         |                     |                    |                    |                      |                      |                           |                          |                                  |                                 |                                 |                                 |                                 |
| H <sub>2</sub> O (1 M)                                                                            | 0                       | 12.99               | 15.36              | 1.90               | -10.53               | -6.21                | -76.47338                 | -76.54981                | -76.55367                        | 0.00                            | 0.00                            | 0.00                            | 0.00                            |
| H <sub>2</sub> O (solvent)                                                                        | 0                       | 12.99               | 15.36              | 1.90               | -11.06               | -1.93                | -76.47338                 | -76.54981                | -76.54986                        | 0.00                            | 0.00                            | 2.39                            | 2.39                            |
| <i>Solvation of molecules in water</i>                                                            |                         |                     |                    |                    |                      |                      |                           |                          |                                  |                                 |                                 |                                 |                                 |
| <i>No water molecule is tightly bound to ammonia borane BH<sub>3</sub>NH<sub>3</sub></i>          |                         |                     |                    |                    |                      |                      |                           |                          |                                  |                                 |                                 |                                 |                                 |
| BH <sub>3</sub> NH <sub>3</sub> + H <sub>2</sub> O                                                | 0                       | 56.77               | 62.01              | 31.71              | -29.32               | -17.28               | -159.75130                | -159.90846               | -159.88246                       | 0.00                            | 0.00                            | 0.00                            | 0.00                            |
| BH <sub>3</sub> NH <sub>3</sub> .OH <sub>2</sub>                                                  | 0                       | 58.74               | 63.45              | 40.93              | -26.02               | -19.26               | -159.76318                | -159.91948               | -159.88194                       | -7.46                           | -6.92                           | 0.33                            | -0.21                           |
| <i>H-bonded complexes may coexist with "freely" solvated NH<sub>3</sub></i>                       |                         |                     |                    |                    |                      |                      |                           |                          |                                  |                                 |                                 |                                 |                                 |
| NH <sub>3</sub> + H <sub>2</sub> O                                                                | 0                       | 34.11               | 38.87              | 11.70              | -25.05               | -8.46                | -133.06794                | -133.20185               | -133.19367                       | 0.00                            | 0.00                            | 0.00                            | 0.00                            |
| NH <sub>3</sub> .H <sub>2</sub> O (N..H)                                                          | 0                       | 36.71               | 40.48              | 20.86              | -19.34               | -12.25               | -133.07856                | -133.21034               | -133.19360                       | -6.67                           | -5.33                           | 0.05                            | -1.30                           |
| NH <sub>3</sub> .OH <sub>2</sub> (H..O)                                                           | 0                       | 36.09               | 40.41              | 19.52              | -25.83               | -14.61               | -133.07138                | -133.20485               | -133.19401                       | -2.16                           | -1.88                           | -0.21                           | -0.49                           |
| <i>In average, only one H<sub>2</sub>O is bound to ammonium cation NH<sub>4</sub><sup>+</sup></i> |                         |                     |                    |                    |                      |                      |                           |                          |                                  |                                 |                                 |                                 |                                 |
| NH <sub>4</sub> <sup>+</sup> + H <sub>2</sub> O                                                   | 0                       | 43.98               | 48.74              | 22.04              | -85.77               | -77.81               | -133.40897                | -133.54109               | -133.62695                       | 0.00                            | 0.00                            | 0.00                            | 0.00                            |
| NH <sub>4</sub> <sup>+</sup> .OH <sub>2</sub>                                                     | 0                       | 46.30               | 50.07              | 30.43              | -70.43               | -68.28               | -133.44176                | -133.57204               | -133.62935                       | -20.57                          | -19.42                          | -1.50                           | -2.66                           |
| NH <sub>4</sub> <sup>+</sup> .OH <sub>2</sub> + H <sub>2</sub> O                                  | 0                       | 59.28               | 65.43              | 32.33              | -81.48               | -70.21               | -209.91514                | -210.12185               | -210.17921                       | 0.00                            | 0.00                            | 0.00                            | 0.00                            |
| NH <sub>4</sub> <sup>+</sup> .(OH <sub>2</sub> ) <sub>2</sub>                                     | 0                       | 61.40               | 66.93              | 42.50              | -69.94               | -64.22               | -209.94197                | -210.14743               | -210.17902                       | -16.84                          | -16.05                          | 0.12                            | -0.67                           |
| <i>Strong base Dbu is not tightly bound to water</i>                                              |                         |                     |                    |                    |                      |                      |                           |                          |                                  |                                 |                                 |                                 |                                 |
| Dbu + H <sub>2</sub> O                                                                            | 0                       | 165.38              | 174.31             | 133.01             | -34.67               | -11.01               | -538.87415                | -539.43913               | -539.24169                       | 0.00                            | 0.00                            | 0.00                            | 0.00                            |
| Dbu.H <sub>2</sub> O (N..H)                                                                       | 0                       | 167.59              | 175.93             | 144.28             | -26.73               | -13.51               | -538.89030                | -539.45246               | -539.24106                       | -10.14                          | -8.37                           | 0.40                            | -1.37                           |
| <i>..and protonated DbuH<sup>+</sup> is also not tightly bound to water</i>                       |                         |                     |                    |                    |                      |                      |                           |                          |                                  |                                 |                                 |                                 |                                 |
| DbuH <sup>+</sup> + H <sub>2</sub> O                                                              | 0                       | 174.39              | 183.50             | 141.88             | -59.61               | -43.43               | -539.29261                | -539.85756               | -539.69766                       | 0.00                            | 0.00                            | 0.00                            | 0.00                            |
| DbuH <sup>+</sup> .OH <sub>2</sub>                                                                | 0                       | 176.44              | 185.19             | 152.81             | -52.83               | -42.57               | -539.31089                | -539.87468               | -539.69599                       | -11.47                          | -10.75                          | 1.05                            | 0.32                            |

..while bicarbonate  $\text{HCO}_3^-$  and formate  $\text{HCO}_2^-$  anions are also "freely" solvated

|                                         |   |       |       |       |         |        |            |            |            |        |        |      |      |
|-----------------------------------------|---|-------|-------|-------|---------|--------|------------|------------|------------|--------|--------|------|------|
| $\text{HCO}_2^- + \text{H}_2\text{O}$   | 0 | 25.56 | 30.40 | -0.06 | -128.85 | -88.30 | -265.79437 | -266.05902 | -266.19681 | 0.00   | 0.00   | 0.00 | 0.00 |
| $\text{HCO}_2^-\cdot\text{H}_2\text{O}$ | 0 | 27.60 | 31.84 | 9.61  | -105.22 | -78.89 | -265.82292 | -266.08560 | -266.19299 | -17.92 | -16.68 | 2.40 | 1.16 |
| $\text{HCO}_3^- + \text{H}_2\text{O}$   | 0 | 28.97 | 34.14 | 1.72  | -129.37 | -88.85 | -341.09234 | -341.43498 | -341.57082 | 0.00   | 0.00   | 0.00 | 0.00 |
| $\text{HCO}_3^-\cdot\text{H}_2\text{O}$ | 0 | 31.26 | 35.57 | 12.92 | -107.96 | -81.00 | -341.12010 | -341.46015 | -341.56563 | -17.42 | -15.80 | 3.26 | 1.63 |

..No stable  $\text{NH}_4^+\text{HCO}_3^-$  and  $\text{NH}_4^+\text{HCO}_2^-$  contact ion pairs exist in water

|                                                    |   |       |       |       |         |         |            |            |            |         |         |      |      |
|----------------------------------------------------|---|-------|-------|-------|---------|---------|------------|------------|------------|---------|---------|------|------|
| $\text{NH}_4^+\cdot\text{OH}_2 + \text{HCO}_2^-$   | 0 | 58.87 | 65.11 | 28.47 | -188.21 | -154.64 | -322.76275 | -323.08125 | -323.27630 | 0.00    | 0.00    | 0.00 | 0.00 |
| $\text{NH}_4^+\text{HCO}_2^- + \text{H}_2\text{O}$ | 0 | 57.68 | 64.05 | 28.98 | -53.36  | -31.53  | -322.94711 | -323.26446 | -323.26550 | -115.69 | -114.97 | 6.78 | 6.05 |

Proton  $\text{H}^+$  is tightly bound to two  $\text{H}_2\text{O}$  in water

|                                               |   |       |       |       |         |        |            |            |            |        |        |      |       |
|-----------------------------------------------|---|-------|-------|-------|---------|--------|------------|------------|------------|--------|--------|------|-------|
| $\text{H}_3\text{O}_2^+ + \text{H}_2\text{O}$ | 0 | 48.76 | 54.48 | 22.76 | -124.68 | -86.33 | -229.75449 | -229.97904 | -230.07734 | 0.00   | 0.00   | 0.00 | 0.00  |
| $\text{H}(\text{H}_2\text{O})_3^+$            | 0 | 51.78 | 56.61 | 33.69 | -99.93  | -74.73 | -229.79270 | -230.01492 | -230.07731 | -23.97 | -22.51 | 0.01 | -1.45 |

Formic acid  $\text{HCO}_2\text{H}$ -aided  $\text{H}_2$ -release from  $\text{BH}_3\text{NH}_3$  is slightly endergonic over a barrier (**TS0**) of 28.5 kcal/mol

|                                                              |      |       |       |       |        |        |            |            |            |       |       |       |       |
|--------------------------------------------------------------|------|-------|-------|-------|--------|--------|------------|------------|------------|-------|-------|-------|-------|
| $\text{BH}_3\text{NH}_3 + \text{HCO}_2\text{H}$              | 0    | 64.46 | 69.92 | 35.36 | -31.83 | -22.16 | -273.16105 | -273.43056 | -273.40350 | 0.00  | 0.00  | 0.00  | 0.00  |
| <b>TS0</b>                                                   | 180i | 62.94 | 68.18 | 43.16 | -38.43 | -25.01 | -273.12681 | -273.38999 | -273.35806 | 21.49 | 25.46 | 28.51 | 24.55 |
| $\text{BH}_2\text{NH}_2 + \text{H}_2 + \text{HCO}_2\text{H}$ | 0    | 56.74 | 64.01 | 20.78 | -18.69 | -7.42  | -273.16128 | -273.43050 | -273.40017 | -0.14 | 0.04  | 2.09  | 1.91  |

..while weak base  $\text{NH}_3$ -bridged  $\text{H}_2$ -release from  $\text{BH}_3\text{NH}_3$  is slower over a higher barrier (**TS0a**)

|                                                                     |      |       |       |       |         |         |            |            |            |        |        |       |       |
|---------------------------------------------------------------------|------|-------|-------|-------|---------|---------|------------|------------|------------|--------|--------|-------|-------|
| $\text{BH}_3\text{NH}_3 + \text{NH}_3\cdot\text{OH}_2$              | 0    | 79.87 | 87.07 | 49.33 | -44.09  | -29.96  | -216.34930 | -216.56350 | -216.52661 | 0.00   | 0.00   | 0.00  | 0.00  |
| $\text{BH}_3\text{NH}_2^- + \text{NH}_4^+\cdot\text{OH}_2$          | 0    | 79.80 | 86.42 | 49.45 | -175.59 | -150.75 | -216.13386 | -216.34616 | -216.50157 | 135.19 | 136.38 | 15.72 | 14.52 |
| <b>TS0a</b> + $\text{H}_2\text{O}$                                  | 685i | 74.54 | 81.70 | 45.41 | -35.70  | -18.98  | -216.31118 | -216.51854 | -216.47342 | 23.92  | 28.21  | 33.38 | 29.09 |
| $\text{BH}_2\text{NH}_2 + \text{H}_2 + \text{NH}_3\cdot\text{OH}_2$ | 0    | 72.15 | 81.15 | 34.75 | -30.95  | -15.22  | -216.34952 | -216.56344 | -216.52328 | -0.14  | 0.04   | 2.09  | 1.91  |

.. single  $\text{H}_2\text{O}$ -bridged  $\text{H}_2$ -release from  $\text{BH}_3\text{NH}_3$  is even more difficult

|                                                            |       |       |       |       |        |        |            |            |            |       |       |       |       |
|------------------------------------------------------------|-------|-------|-------|-------|--------|--------|------------|------------|------------|-------|-------|-------|-------|
| $\text{BH}_3\text{NH}_3 + \text{H}_2\text{O}$              | 0     | 56.77 | 62.01 | 31.71 | -29.32 | -17.28 | -159.75130 | -159.90846 | -159.88246 | 0.00  | 0.00  | 0.00  | 0.00  |
| <b>TS0b</b>                                                | 1091i | 53.61 | 57.39 | 36.87 | -14.39 | -7.66  | -159.72217 | -159.86872 | -159.81915 | 18.28 | 24.94 | 39.73 | 33.06 |
| $\text{BH}_2\text{NH}_2 + \text{H}_2 + \text{H}_2\text{O}$ | 0     | 49.05 | 56.10 | 17.13 | -16.18 | -2.54  | -159.75152 | -159.90840 | -159.87913 | -0.14 | 0.04  | 2.09  | 1.91  |

Hydration of  $\text{CO}_2$  is 2.7 kcal/mol endergonic over a barrier (**TS1**) of 19.0 kcal/mol mediated by three  $\text{H}_2\text{O}$ .

|                                              |      |       |       |       |        |        |            |            |            |       |       |       |       |
|----------------------------------------------|------|-------|-------|-------|--------|--------|------------|------------|------------|-------|-------|-------|-------|
| $\text{CO}_2 + 2\text{H}_2\text{O}$          | 0    | 33.11 | 40.09 | -2.05 | -23.46 | -2.30  | -341.65219 | -341.99353 | -341.99743 | 0.00  | 0.00  | 0.00  | 0.00  |
| <b>TS1a</b>                                  | 645i | 36.40 | 40.51 | 18.36 | -45.71 | -26.83 | -341.62110 | -341.95459 | -341.96507 | 19.51 | 24.43 | 20.31 | 15.39 |
| <b>TS1</b> - $\text{H}_2\text{O}$            | 500i | 38.33 | 41.73 | 29.24 | -27.72 | -22.01 | -341.65086 | -341.98174 | -341.96721 | 0.83  | 7.40  | 18.96 | 12.40 |
| $\text{H}_2\text{CO}_3 + \text{H}_2\text{O}$ | 0    | 36.96 | 42.29 | 10.02 | -34.79 | -14.09 | -341.64618 | -341.98971 | -341.99320 | 3.77  | 2.39  | 2.66  | 4.04  |

..while overall reaction with  $\text{NH}_3$  is -5.5 kcal/mol exergonic to form  $\text{NH}_4^+$  and dicarbonate  $\text{HCO}_3^-$

|                                                                         |   |       |       |       |        |        |            |            |            |      |      |      |      |
|-------------------------------------------------------------------------|---|-------|-------|-------|--------|--------|------------|------------|------------|------|------|------|------|
| $\text{CO}_2 + \text{H}_2\text{O} + \text{NH}_3\cdot\text{H}_2\text{O}$ | 0 | 56.21 | 65.15 | 15.57 | -38.23 | -14.97 | -398.25019 | -398.64856 | -398.64158 | 0.00 | 0.00 | 0.00 | 0.00 |
|-------------------------------------------------------------------------|---|-------|-------|-------|--------|--------|------------|------------|------------|------|------|------|------|

|                                                                                                                                                                                          |      |       |       |       |         |         |            |            |            |        |        |        |       |
|------------------------------------------------------------------------------------------------------------------------------------------------------------------------------------------|------|-------|-------|-------|---------|---------|------------|------------|------------|--------|--------|--------|-------|
| H <sub>2</sub> CO <sub>3</sub> + NH <sub>3</sub> .H <sub>2</sub> O                                                                                                                       | 0    | 60.06 | 67.34 | 27.64 | -49.56  | -26.77  | -398.24418 | -398.64475 | -398.63734 | 3.77   | 2.39   | 2.66   | 4.04  |
| NH <sub>4</sub> <sup>+</sup> HCO <sub>3</sub> <sup>-</sup> + H <sub>2</sub> O                                                                                                            | 0    | 60.97 | 67.85 | 31.36 | -65.99  | -40.84  | -398.23259 | -398.62782 | -398.63991 | 11.05  | 13.01  | 1.05   | -0.92 |
| NH <sub>4</sub> <sup>+</sup> .OH <sub>2</sub> + HCO <sub>3</sub> <sup>-</sup>                                                                                                            | 0    | 62.28 | 68.85 | 30.25 | -188.74 | -155.20 | -398.06072 | -398.45721 | -398.65030 | 118.89 | 120.07 | -5.47  | -6.66 |
| <i>..for comparison, reaction of formic acid HCO<sub>2</sub>H with NH<sub>3</sub> is slightly more exergonic in water</i>                                                                |      |       |       |       |         |         |            |            |            |        |        |        |       |
| HCO <sub>2</sub> H + NH <sub>3</sub> .H <sub>2</sub> O                                                                                                                                   | 0    | 56.76 | 63.68 | 25.07 | -39.40  | -21.42  | -322.95451 | -323.27676 | -323.26491 | 0.00   | 0.00   | 0.00   | 0.00  |
| NH <sub>4</sub> <sup>+</sup> HCO <sub>2</sub> <sup>-</sup> + H <sub>2</sub> O                                                                                                            | 0    | 57.68 | 64.05 | 28.98 | -53.36  | -31.53  | -322.94711 | -323.26446 | -323.26550 | 4.64   | 7.71   | -0.37  | -3.45 |
| NH <sub>4</sub> <sup>+</sup> .OH <sub>2</sub> + HCO <sub>2</sub> <sup>-</sup>                                                                                                            | 0    | 58.87 | 65.11 | 28.47 | -188.21 | -154.64 | -322.76275 | -323.08125 | -323.27630 | 120.33 | 122.68 | -7.15  | -9.50 |
| <i>CO<sub>2</sub> itself cannot replace the NH<sub>3</sub> group from ammonia borane BH<sub>3</sub>NH<sub>3</sub></i>                                                                    |      |       |       |       |         |         |            |            |            |        |        |        |       |
| BH <sub>3</sub> NH <sub>3</sub> + CO <sub>2</sub>                                                                                                                                        | 0    | 50.92 | 56.03 | 23.96 | -19.61  | -13.78  | -271.98334 | -272.25255 | -272.23031 | 0.00   | 0.00   | 0.00   | 0.00  |
| <b>TS20</b>                                                                                                                                                                              | 156i | 46.85 | 52.99 | 25.87 | -7.95   | -2.86   | -271.93962 | -272.20868 | -272.16900 | 27.44  | 27.53  | 38.48  | 38.38 |
| BH <sub>3</sub> OCO + NH <sub>3</sub>                                                                                                                                                    | 0    | 47.46 | 53.67 | 18.95 | -17.32  | -6.46   | -271.93424 | -272.20294 | -272.17700 | 30.82  | 31.13  | 33.45  | 33.13 |
| <i>..Transfer hydrogenation of CO<sub>2</sub> with BH<sub>3</sub>NH<sub>3</sub> is possible over a sizable barrier (TS2) of 25.9 kcal/mol, followed by facile addition over B=N bond</i> |      |       |       |       |         |         |            |            |            |        |        |        |       |
| BH <sub>3</sub> NH <sub>3</sub> + CO <sub>2</sub>                                                                                                                                        | 0    | 50.92 | 56.03 | 23.96 | -19.61  | -13.78  | -271.98334 | -272.25255 | -272.23031 | 0.00   | 0.00   | 0.00   | 0.00  |
| <b>TS2</b>                                                                                                                                                                               | 757i | 49.26 | 53.50 | 31.05 | -23.35  | -15.98  | -271.95397 | -272.21606 | -272.18903 | 18.43  | 22.90  | 25.90  | 21.44 |
| BH <sub>2</sub> NH <sub>3</sub> <sup>+</sup> + HCO <sub>2</sub> <sup>-</sup>                                                                                                             | 0    | 50.64 | 55.90 | 21.72 | -187.41 | -155.04 | -271.71813 | -271.98905 | -272.19548 | 166.43 | 165.35 | 21.86  | 22.93 |
| BH <sub>2</sub> NH <sub>2</sub> + HCO <sub>2</sub> H                                                                                                                                     | 0    | 50.40 | 55.60 | 21.66 | -18.01  | -8.72   | -271.98068 | -272.25456 | -272.22792 | 1.67   | -1.26  | 1.50   | 4.43  |
| <b>TS3a</b>                                                                                                                                                                              | 172i | 51.48 | 55.74 | 33.30 | -9.45   | -4.96   | -271.98650 | -272.25619 | -272.20801 | -1.98  | -2.28  | 13.99  | 14.30 |
| HCO <sub>2</sub> BH <sub>2</sub> NH <sub>3</sub>                                                                                                                                         | 0    | 54.42 | 58.60 | 36.48 | -19.87  | -14.47  | -272.01375 | -272.28560 | -272.24751 | -19.08 | -20.74 | -10.79 | -9.13 |
| <i>..Hydrolysis of BH<sub>3</sub>NH<sub>3</sub> via S<sub>N</sub>2 replacement in water is 2.0 kcal/mol endergonic over a higher barrier of 28.0 kcal/mol</i>                            |      |       |       |       |         |         |            |            |            |        |        |        |       |
| BH <sub>3</sub> NH <sub>3</sub> + 2H <sub>2</sub> O                                                                                                                                      | 0    | 69.75 | 77.37 | 33.61 | -40.38  | -19.22  | -236.22468 | -236.45827 | -236.43232 | 0.00   | 0.00   | 0.00   | 0.00  |
| <b>TS2a</b> + H <sub>2</sub> O                                                                                                                                                           | 306i | 68.99 | 76.58 | 39.63 | -32.95  | -15.95  | -236.19793 | -236.42840 | -236.38766 | 16.79  | 18.74  | 28.03  | 26.07 |
| BH <sub>3</sub> OH <sub>2</sub> + NH <sub>3</sub> .OH <sub>2</sub>                                                                                                                       | 0    | 70.89 | 78.17 | 39.69 | -54.10  | -33.05  | -236.20113 | -236.43417 | -236.41756 | 14.78  | 15.12  | 9.26   | 8.91  |
| BH <sub>3</sub> OH <sup>-</sup> + NH <sub>4</sub> <sup>+</sup> .OH <sub>2</sub>                                                                                                          | 0    | 72.13 | 78.70 | 41.85 | -175.66 | -151.53 | -236.02988 | -236.26033 | -236.42909 | 122.24 | 124.21 | 2.03   | 0.05  |
| <i>..S<sub>N</sub>2 replacement of BH<sub>3</sub>NH<sub>3</sub> with dicarbonate HCO<sub>3</sub><sup>-</sup> is kinetically much less favorable</i>                                      |      |       |       |       |         |         |            |            |            |        |        |        |       |
| BH <sub>3</sub> NH <sub>3</sub> + HCO <sub>3</sub> <sup>-</sup>                                                                                                                          | 0    | 59.76 | 65.43 | 29.63 | -136.58 | -102.27 | -347.89688 | -348.24382 | -348.35356 | 0.00   | 0.00   | 0.00   | 0.00  |
| <b>TS2a<sup>-</sup></b>                                                                                                                                                                  | 395i | 57.93 | 64.19 | 37.09 | -115.40 | -87.15  | -347.87880 | -348.22174 | -348.29850 | 11.35  | 13.86  | 34.55  | 32.04 |
| BH <sub>3</sub> OCO <sub>2</sub> H <sup>-</sup> + NH <sub>3</sub>                                                                                                                        | 0    | 57.48 | 63.76 | 28.55 | -104.61 | -80.26  | -347.91494 | -348.26351 | -348.33990 | -11.33 | -12.36 | 8.57   | 9.60  |
| NH <sub>4</sub> <sup>+</sup> BH <sub>3</sub> OCO <sub>2</sub> <sup>-</sup>                                                                                                               | 0    | 59.82 | 65.23 | 40.12 | -145.96 | -110.38 | -347.88540 | -348.22817 | -348.33714 | 7.21   | 9.82   | 10.31  | 7.69  |
| <i>..formate anion HCO<sub>2</sub><sup>-</sup> is also less bound to BH<sub>3</sub> than NH<sub>3</sub></i>                                                                              |      |       |       |       |         |         |            |            |            |        |        |        |       |
| BH <sub>3</sub> NH <sub>3</sub> + HCO <sub>2</sub> <sup>-</sup>                                                                                                                          | 0    | 56.36 | 61.70 | 27.85 | -136.05 | -101.72 | -272.59890 | -272.86786 | -272.97955 | 0.00   | 0.00   | 0.00   | 0.00  |
| <b>TS2b<sup>-</sup></b>                                                                                                                                                                  | 0    | 54.80 | 60.58 | 34.81 | -112.70 | -85.14  | -272.58651 | -272.85098 | -272.92817 | 7.78   | 10.59  | 32.25  | 29.43 |

|                                                                                                                                                                 |      |       |       |       |         |         |            |            |            |        |        |        |        |
|-----------------------------------------------------------------------------------------------------------------------------------------------------------------|------|-------|-------|-------|---------|---------|------------|------------|------------|--------|--------|--------|--------|
| HCO <sub>2</sub> BH <sub>3</sub> <sup>-</sup> + NH <sub>3</sub>                                                                                                 | 0    | 54.01 | 59.97 | 25.96 | -94.79  | -73.33  | -272.62924 | -272.89929 | -272.96875 | -19.03 | -19.72 | 6.78   | 7.47   |
| <i>..Transfer hydrogenation of bicarbonate HCO<sub>3</sub><sup>-</sup> is not feasible over a very high barrier (TS2c<sup>-</sup>) of 47.4 kcal/mol</i>         |      |       |       |       |         |         |            |            |            |        |        |        |        |
| BH <sub>3</sub> NH <sub>3</sub> + HCO <sub>3</sub> <sup>-</sup>                                                                                                 | 0    | 59.76 | 65.43 | 29.63 | -136.58 | -102.27 | -347.89688 | -348.24382 | -348.35356 | 0.00   | 0.00   | 0.00   | 0.00   |
| BH <sub>3</sub> NH <sub>2</sub> <sup>+</sup> + H <sub>2</sub> CO <sub>3</sub>                                                                                   | 0    | 57.48 | 63.28 | 27.14 | -128.90 | -94.64  | -347.86490 | -348.21402 | -348.31555 | 20.07  | 18.70  | 23.85  | 25.22  |
| <b>TS2c<sup>-</sup></b>                                                                                                                                         | 519i | 57.50 | 62.67 | 38.25 | -106.81 | -79.19  | -347.87573 | -348.21576 | -348.27799 | 13.27  | 17.61  | 47.42  | 43.09  |
| HCO(OH) <sub>2</sub> <sup>-</sup> + BH <sub>2</sub> NH <sub>2</sub>                                                                                             | 0    | 58.31 | 64.45 | 27.90 | -130.91 | -90.99  | -347.87112 | -348.21938 | -348.31390 | 16.17  | 15.34  | 24.89  | 25.72  |
| <i>..transient BH<sub>2</sub>NH<sub>2</sub> does not exist in water due to very rapid water addition</i>                                                        |      |       |       |       |         |         |            |            |            |        |        |        |        |
| BH <sub>2</sub> NH <sub>2</sub> + 2H <sub>2</sub> O                                                                                                             | 0    | 55.70 | 63.05 | 19.90 | -26.56  | -5.78   | -235.04431 | -235.28227 | -235.25675 | 0.00   | 0.00   | 0.00   | 0.00   |
| <b>TS3</b>                                                                                                                                                      | 895i | 58.66 | 62.82 | 41.08 | -21.25  | -12.22  | -235.06122 | -235.28884 | -235.23982 | -10.61 | -4.12  | 10.62  | 4.13   |
| <b>TS3b</b> - H <sub>2</sub> O                                                                                                                                  | 885i | 60.66 | 63.78 | 52.35 | -19.96  | -15.88  | -235.07711 | -235.30064 | -235.23952 | -20.58 | -11.52 | 10.81  | 1.75   |
| HOBH <sub>2</sub> NH <sub>3</sub> + H <sub>2</sub> O                                                                                                            | 0    | 60.31 | 66.12 | 33.13 | -39.81  | -21.82  | -235.06381 | -235.29879 | -235.27776 | -12.23 | -10.37 | -13.19 | -15.05 |
| <i>Further hydrolysis aided by base NH<sub>3</sub> is still facile over a low barrier (TS4) of 18.1 kcal/mol to form another borate anion</i>                   |      |       |       |       |         |         |            |            |            |        |        |        |        |
| HOBH <sub>2</sub> NH <sub>3</sub> + H <sub>2</sub> O                                                                                                            | 0    | 60.31 | 66.12 | 33.13 | -39.81  | -21.82  | -235.06381 | -235.29879 | -235.27776 | 0.00   | 0.00   | 0.00   | 0.00   |
| <b>TS4</b>                                                                                                                                                      | 164i | 59.07 | 65.47 | 38.72 | -27.73  | -16.14  | -235.05251 | -235.28797 | -235.24898 | 7.09   | 6.79   | 18.06  | 18.36  |
| HOBH <sub>2</sub> OH <sub>2</sub> + NH <sub>3</sub>                                                                                                             | 0    | 59.61 | 65.55 | 32.10 | -46.80  | -26.85  | -235.04664 | -235.28155 | -235.26715 | 10.77  | 10.82  | 6.66   | 6.61   |
| BH <sub>2</sub> (OH) <sub>2</sub> <sup>-</sup> + NH <sub>4</sub> <sup>+</sup>                                                                                   | 0    | 60.94 | 66.66 | 34.03 | -193.46 | -164.10 | -234.84309 | -235.07697 | -235.27821 | 138.50 | 139.20 | -0.28  | -0.98  |
| <i>..while transfer hydrogenation with HOBH<sub>2</sub>NH<sub>3</sub> (via TS4a) is kinetically much more favorable than with BH<sub>3</sub>NH<sub>3</sub>!</i> |      |       |       |       |         |         |            |            |            |        |        |        |        |
| HOBH <sub>2</sub> NH <sub>3</sub> + CO <sub>2</sub>                                                                                                             | 0    | 54.46 | 60.14 | 25.38 | -30.10  | -18.32  | -347.29586 | -347.64289 | -347.62561 | 0.00   | 0.00   | 0.00   | 0.00   |
| <b>TS4a</b>                                                                                                                                                     | 340i | 53.85 | 59.24 | 33.99 | -23.59  | -16.94  | -347.28498 | -347.62555 | -347.59538 | 6.82   | 10.88  | 18.97  | 14.92  |
| HCO <sub>2</sub> H + HOBH <sub>2</sub> NH <sub>2</sub>                                                                                                          | 0    | 54.29 | 59.94 | 23.65 | -27.83  | -14.74  | -347.30920 | -347.66259 | -347.64236 | -8.37  | -12.37 | -10.51 | -6.52  |
| <i>..and even 1.6 kcal/mol more favorable with alkoxy-substituted MeOBH<sub>2</sub>NH<sub>3</sub></i>                                                           |      |       |       |       |         |         |            |            |            |        |        |        |        |
| CO <sub>2</sub> + MeOBH <sub>2</sub> NH <sub>3</sub>                                                                                                            | 0    | 72.33 | 78.68 | 41.95 | -23.84  | -14.07  | -386.62217 | -387.00759 | -386.95714 | 0.00   | 0.00   | 0.00   | 0.00   |
| <b>TS4b</b>                                                                                                                                                     | 382i | 71.06 | 77.53 | 49.64 | -19.28  | -13.45  | -386.61241 | -386.99019 | -386.92950 | 6.13   | 10.92  | 17.34  | 12.55  |
| MeOBH <sub>2</sub> NH <sub>2</sub> .HCO <sub>2</sub> H                                                                                                          | 0    | 73.16 | 79.61 | 51.70 | -19.53  | -10.89  | -386.64131 | -387.02896 | -386.96091 | -12.01 | -13.41 | -2.36  | -0.97  |
| MeOBH <sub>2</sub> NH <sub>2</sub> + HCO <sub>2</sub> H                                                                                                         | 0    | 71.84 | 78.39 | 39.67 | -22.25  | -10.00  | -386.63659 | -387.02748 | -386.97416 | -9.05  | -12.48 | -10.68 | -7.25  |
| <i>In contrast, transfer hydrogenation with BH<sub>3</sub>NHMe<sub>2</sub> is less favorable than with BH<sub>3</sub>NH<sub>3</sub></i>                         |      |       |       |       |         |         |            |            |            |        |        |        |        |
| CO <sub>2</sub> + BH <sub>2</sub> NHMe <sub>2</sub>                                                                                                             | 0    | 86.48 | 92.71 | 56.41 | -16.70  | -8.07   | -350.65373 | -351.00214 | -350.91907 | 0.00   | 0.00   | 0.00   | 0.00   |
| <b>TS4c</b>                                                                                                                                                     | 694i | 83.76 | 89.89 | 63.21 | -20.92  | -11.10  | -350.62051 | -350.96110 | -350.87504 | 20.85  | 25.75  | 27.63  | 22.73  |
| BH <sub>2</sub> NMe <sub>2</sub> + HCO <sub>2</sub> H                                                                                                           | 0    | 85.68 | 92.23 | 53.43 | -18.27  | -6.61   | -350.64273 | -350.99517 | -350.91453 | 6.90   | 4.37   | 2.85   | 5.38   |
| <i>..In contrast, formate anion HCO<sub>2</sub><sup>-</sup> cannot replace NH<sub>3</sub> from HOBH<sub>2</sub>NH<sub>3</sub></i>                               |      |       |       |       |         |         |            |            |            |        |        |        |        |
| HOBH <sub>2</sub> NH <sub>3</sub> + HCO <sub>2</sub> <sup>-</sup>                                                                                               | 0    | 59.90 | 65.80 | 29.27 | -146.54 | -106.26 | -347.91141 | -348.25819 | -348.37485 | 0.00   | 0.00   | 0.00   | 0.00   |

|                                                                                                                                                            |       |       |       |       |         |         |            |            |            |        |        |        |        |
|------------------------------------------------------------------------------------------------------------------------------------------------------------|-------|-------|-------|-------|---------|---------|------------|------------|------------|--------|--------|--------|--------|
| <b>TS4<sup>-</sup></b>                                                                                                                                     | 216i  | 57.73 | 64.77 | 35.67 | -124.51 | -90.63  | -347.90506 | -348.25050 | -348.33506 | 3.98   | 4.83   | 24.97  | 24.13  |
| HCO <sub>2</sub> BH <sub>2</sub> OH <sup>-</sup> + NH <sub>3</sub>                                                                                         | 0     | 57.79 | 64.40 | 28.39 | -108.08 | -78.96  | -347.94540 | -348.29377 | -348.36833 | -21.33 | -22.32 | 4.09   | 5.09   |
| <i>Competitive channels for H<sub>2</sub>-release via hydrolysis are also possible but kinetically less favorable</i>                                      |       |       |       |       |         |         |            |            |            |        |        |        |        |
| HCO <sub>2</sub> BH <sub>2</sub> OH <sup>-</sup> + H <sub>2</sub> O                                                                                        | 0     | 49.65 | 56.24 | 20.49 | -105.14 | -74.36  | -367.82422 | -368.19154 | -368.27438 | 0.00   | 0.00   | 0.00   | 0.00   |
| <b>TS5a<sup>-</sup></b>                                                                                                                                    | 141i  | 50.08 | 56.90 | 28.25 | -133.66 | -97.31  | -367.77879 | -368.14431 | -368.25135 | 28.51  | 29.64  | 14.45  | 13.32  |
| HCO <sub>2</sub> <sup>-</sup> + HOBH <sub>2</sub> OH <sub>2</sub>                                                                                          | 0     | 51.07 | 57.08 | 20.34 | -150.60 | -106.68 | -367.77306 | -368.13872 | -368.27029 | 32.10  | 33.14  | 2.57   | 1.53   |
| HCO <sub>2</sub> H + BH <sub>2</sub> (OH) <sub>2</sub> <sup>-</sup>                                                                                        | 0     | 50.62 | 56.55 | 19.45 | -132.33 | -95.03  | -367.79063 | -368.15760 | -368.27202 | 21.08  | 21.30  | 1.48   | 1.26   |
| <b>TS5b<sup>-</sup></b>                                                                                                                                    | 669i  | 47.99 | 53.89 | 27.15 | -94.99  | -71.15  | -367.81942 | -368.17866 | -368.24576 | 3.01   | 8.08   | 17.96  | 12.89  |
| BH(OH) <sub>2</sub> + HCO <sub>2</sub> <sup>-</sup> + H <sub>2</sub>                                                                                       | 0     | 44.89 | 52.30 | 7.76  | -135.45 | -93.46  | -367.81840 | -368.18456 | -368.31210 | 3.66   | 4.38   | -23.67 | -24.39 |
| BH <sub>3</sub> NH <sub>3</sub> + 2H <sub>2</sub> O                                                                                                        | 0     | 69.75 | 77.37 | 33.61 | -40.38  | -19.22  | -236.22468 | -236.45827 | -236.43232 | 0.00   | 0.00   | 0.00   | 0.00   |
| BH <sub>3</sub> OH <sup>-</sup> + NH <sub>4</sub> <sup>+</sup> .OH <sub>2</sub>                                                                            | 0     | 72.13 | 78.70 | 41.85 | -175.66 | -151.53 | -236.02988 | -236.26033 | -236.42909 | 122.24 | 124.21 | 2.03   | 0.05   |
| <b>TS5cn</b>                                                                                                                                               | 347i  | 69.23 | 75.51 | 49.16 | -18.21  | -9.86   | -236.23338 | -236.45824 | -236.39261 | -5.46  | 0.02   | 24.92  | 19.44  |
| BH <sub>2</sub> OH + NH <sub>3</sub> .OH <sub>2</sub> + H <sub>2</sub>                                                                                     | 0     | 64.25 | 73.16 | 26.56 | -36.53  | -17.56  | -236.22855 | -236.45985 | -236.43646 | -2.43  | -0.99  | -2.60  | -4.04  |
| <i>..and HCO<sub>2</sub>H aided H<sub>2</sub> release from HOBH<sub>2</sub>NH<sub>3</sub> is kinetically less favorable than H<sub>2</sub>O hydrolysis</i> |       |       |       |       |         |         |            |            |            |        |        |        |        |
| HOBH <sub>2</sub> NH <sub>3</sub> + HCO <sub>2</sub> H                                                                                                     | 0     | 68.00 | 74.03 | 36.79 | -42.33  | -26.70  | -348.47356 | -348.82089 | -348.79880 | 0.00   | 0.00   | 0.00   | 0.00   |
| <b>TS5d</b>                                                                                                                                                | 400i  | 65.19 | 71.16 | 44.63 | -42.22  | -28.20  | -348.44650 | -348.78647 | -348.75728 | 16.98  | 21.60  | 26.05  | 21.43  |
| HCO <sub>2</sub> BH(OH)NH <sub>3</sub> + H <sub>2</sub>                                                                                                    | 0     | 63.86 | 70.92 | 37.58 | -29.19  | -16.77  | -348.51574 | -348.86234 | -348.82317 | -26.47 | -26.01 | -15.29 | -15.75 |
| <i>..with H<sub>2</sub> release via BH<sub>2</sub>NH<sub>2</sub> hydrolysis being kinetically much less favorable</i>                                      |       |       |       |       |         |         |            |            |            |        |        |        |        |
| BH <sub>2</sub> NH <sub>2</sub> + 2H <sub>2</sub> O                                                                                                        | 0     | 55.70 | 63.05 | 19.90 | -26.56  | -5.78   | -235.04431 | -235.28227 | -235.25675 | 0.00   | 0.00   | 0.00   | 0.00   |
| <b>TS5c - H<sub>2</sub>O</b>                                                                                                                               | 885i  | 59.96 | 62.98 | 51.66 | -28.96  | -20.10  | -235.04653 | -235.26989 | -235.21659 | -1.39  | 7.77   | 25.20  | 16.04  |
| <b>TS5ca</b>                                                                                                                                               | 1097i | 57.31 | 61.76 | 39.45 | -29.76  | -15.82  | -235.02752 | -235.25435 | -235.21368 | 10.54  | 17.52  | 27.02  | 20.04  |
| HOBHNH <sub>2</sub> + H <sub>2</sub> + H <sub>2</sub> O                                                                                                    | 0     | 52.94 | 60.44 | 19.12 | -25.99  | -8.56   | -235.08004 | -235.31643 | -235.29357 | -22.42 | -21.44 | -23.11 | -24.09 |
| <i>..Further hydrolysis of BH(OH)<sub>2</sub> with water is still facile</i>                                                                               |       |       |       |       |         |         |            |            |            |        |        |        |        |
| BH(OH) <sub>2</sub> + 3H <sub>2</sub> O                                                                                                                    | 0     | 64.94 | 74.92 | 16.29 | -50.15  | -14.19  | -406.73696 | -407.14885 | -407.14249 | 0.00   | 0.00   | 0.00   | 0.00   |
| BH(OH) <sub>3</sub> <sup>-</sup> + H <sub>5</sub> O <sub>2</sub> <sup>+</sup>                                                                              | 0     | 69.32 | 76.64 | 37.19 | -240.39 | -174.79 | -406.51721 | -406.92331 | -407.13657 | 137.89 | 141.53 | 3.71   | 0.08   |
| <b>TS6</b>                                                                                                                                                 | 606i  | 68.45 | 75.10 | 47.61 | -60.33  | -34.45  | -406.73367 | -407.13224 | -407.10826 | 2.06   | 10.42  | 21.48  | 13.12  |
| B(OH) <sub>3</sub> + 2H <sub>2</sub> O + H <sub>2</sub>                                                                                                    | 0     | 62.26 | 72.39 | 16.97 | -45.73  | -14.27  | -406.77581 | -407.18773 | -407.17740 | -24.38 | -24.40 | -21.91 | -21.89 |
| <i>..less likely with only one H<sub>2</sub>O as proton bridge</i>                                                                                         |       |       |       |       |         |         |            |            |            |        |        |        |        |
| BH(OH) <sub>2</sub> + H <sub>2</sub> O                                                                                                                     | 0     | 38.97 | 44.21 | 12.49 | -28.03  | -10.33  | -253.79020 | -254.04922 | -254.04277 | 0.00   | 0.00   | 0.00   | 0.00   |
| BH(OH) <sub>2</sub> .H <sub>2</sub> O                                                                                                                      | 0     | 40.75 | 45.73 | 22.13 | -27.32  | -15.36  | -253.79685 | -254.05528 | -254.04149 | -4.17  | -3.80  | 0.80   | 0.43   |
| <b>TS6a</b>                                                                                                                                                | 945i  | 40.50 | 43.24 | 32.71 | -31.65  | -20.76  | -253.77191 | -254.02142 | -253.99936 | 11.48  | 17.45  | 27.23  | 21.26  |

|                                                                                                                                                                                                   |      |       |        |       |         |         |            |            |            |         |         |        |        |
|---------------------------------------------------------------------------------------------------------------------------------------------------------------------------------------------------|------|-------|--------|-------|---------|---------|------------|------------|------------|---------|---------|--------|--------|
| $B(OH)_3 + H_2$                                                                                                                                                                                   | 0    | 36.29 | 41.67  | 13.16 | -23.62  | -10.40  | -253.82905 | -254.08810 | -254.07768 | -24.38  | -24.40  | -21.91 | -21.89 |
| <i>..which is energetically more favorable than trimer <math>(BH_2NH_2)_3</math> formation</i>                                                                                                    |      |       |        |       |         |         |            |            |            |         |         |        |        |
| $BH_2NH_2$                                                                                                                                                                                        | 0    | 29.73 | 32.33  | 16.10 | -4.44   | -1.91   | -82.09755  | -82.18265  | -82.15702  | 0.00    | 0.00    | 0.00   | 0.00   |
| $1/3(BH_2NH_2)_3$                                                                                                                                                                                 | 0    | 32.88 | 34.47  | 26.93 | -6.18   | -4.96   | -82.12138  | -82.20524  | -82.16923  | -14.95  | -14.17  | -7.66  | -8.44  |
| $(BH_2NH_2)_3$                                                                                                                                                                                    | 0    | 98.64 | 103.40 | 80.78 | -18.53  | -14.89  | -246.36413 | -246.61571 | -246.50770 |         |         |        |        |
| <i>.. hydride transfer from <math>HCO_2BH_2OH^-</math> to <math>CO_2</math> is also possible but kinetically less favorable</i>                                                                   |      |       |        |       |         |         |            |            |            |         |         |        |        |
| $HCO_2BH_2OH^- + CO_2$                                                                                                                                                                            | 0    | 43.80 | 50.26  | 12.74 | -95.43  | -70.86  | -480.05627 | -480.53563 | -480.62223 | 0.00    | 0.00    | 0.00   | 0.00   |
| <b>TS7<sup>-</sup></b>                                                                                                                                                                            | 435i | 43.32 | 49.53  | 21.87 | -71.76  | -57.41  | -480.06233 | -480.53657 | -480.59019 | -3.80   | -0.59   | 20.11  | 16.89  |
| $HCO_2BHOH + HCO_2^-$                                                                                                                                                                             | 0    | 45.18 | 51.24  | 13.32 | -124.11 | -88.58  | -480.03955 | -480.52229 | -480.63619 | 10.50   | 8.37    | -8.76  | -6.64  |
| $(HCO_2)_2BHOH^-$                                                                                                                                                                                 | 0    | 46.56 | 52.56  | 25.54 | -88.97  | -66.38  | -480.10561 | -480.58900 | -480.65108 | -30.96  | -33.49  | -18.10 | -15.57 |
| <i>Hydride transfer from <math>BH_2(OH)_2^-</math> to <math>CO_2</math> is facile over a low barrier (<b>TS8<sup>-</sup></b>)</i>                                                                 |      |       |        |       |         |         |            |            |            |         |         |        |        |
| $CO_2 + BH_2(OH)_2^-$                                                                                                                                                                             | 0    | 37.08 | 42.66  | 8.04  | -120.10 | -86.65  | -366.61293 | -366.97959 | -367.09884 | 0.00    | 0.00    | 0.00   | 0.00   |
| <b>TS8<sup>-</sup></b>                                                                                                                                                                            | 300i | 36.45 | 41.93  | 16.26 | -95.84  | -72.03  | -366.62675 | -366.98905 | -367.07491 | -8.67   | -5.94   | 15.01  | 12.28  |
| $HCO_2BH(OH)_2^-$                                                                                                                                                                                 | 0    | 40.28 | 45.12  | 21.29 | -106.40 | -77.62  | -366.67350 | -367.04411 | -367.13086 | -38.01  | -40.49  | -20.10 | -17.62 |
| $HCO_2^- + BH(OH)_2$                                                                                                                                                                              | 0    | 38.56 | 43.89  | 8.63  | -134.77 | -94.76  | -366.63780 | -367.00862 | -367.13986 | -15.61  | -18.22  | -25.74 | -23.13 |
| <i>..followed by base <math>NH_3</math> assisted hydrolysis of <math>BH(OH)_2</math></i>                                                                                                          |      |       |        |       |         |         |            |            |            |         |         |        |        |
| $BH(OH)_2 + H_2O$                                                                                                                                                                                 | 0    | 38.97 | 44.21  | 12.49 | -28.03  | -10.33  | -253.79020 | -254.04922 | -254.04277 | 0.00    | 0.00    | 0.00   | 0.00   |
| $BH(OH)_2 \cdot OH_2$                                                                                                                                                                             | 0    | 40.75 | 45.73  | 22.13 | -27.32  | -15.36  | -253.79685 | -254.05528 | -254.04149 | -4.17   | -3.80   | 0.80   | 0.43   |
| $BH(OH)_2 + NH_3 \cdot OH_2$                                                                                                                                                                      | 0    | 62.07 | 69.26  | 30.11 | -42.81  | -23.01  | -310.38820 | -310.70426 | -310.68691 | 0.00    | 0.00    | 0.00   | 0.00   |
| $BH(OH)_2 \cdot NH_3 + H_2O$                                                                                                                                                                      | 0    | 63.68 | 70.16  | 35.30 | -47.16  | -24.69  | -310.38686 | -310.70156 | -310.68163 | 0.84    | 1.69    | 3.31   | 2.46   |
| $BH(OH)_3^- + NH_4^+ \cdot OH_2 - H_2O$                                                                                                                                                           | 0    | 66.86 | 72.23  | 44.86 | -186.14 | -156.74 | -310.20447 | -310.51631 | -310.68858 | 115.29  | 117.94  | -1.05  | -3.70  |
| <i>..and further facile hydride transfer from borate <math>BH(OH)_3^-</math> to <math>CO_2</math> to form neutral <math>B(OH)_3</math></i>                                                        |      |       |        |       |         |         |            |            |            |         |         |        |        |
| $CO_2 + BH(OH)_3^-$                                                                                                                                                                               | 0    | 40.69 | 46.89  | 10.48 | -128.12 | -88.83  | -441.94152 | -442.38798 | -442.50681 | 0.00    | 0.00    | 0.00   | 0.00   |
| <b>TS9<sup>-</sup></b>                                                                                                                                                                            | 303i | 40.01 | 46.29  | 18.51 | -103.48 | -74.78  | -441.95374 | -442.39498 | -442.48164 | -7.67   | -4.39   | 15.79  | 12.52  |
| $HCO_2B(OH)_3^-$                                                                                                                                                                                  | 0    | 43.03 | 48.88  | 22.81 | -114.57 | -81.13  | -441.99882 | -442.45032 | -442.54023 | -35.95  | -39.12  | -20.98 | -17.81 |
| $HCO_2^- + B(OH)_3$                                                                                                                                                                               | 0    | 42.53 | 48.30  | 12.08 | -140.72 | -98.07  | -441.96944 | -442.42137 | -442.55238 | -17.52  | -20.95  | -28.60 | -25.17 |
| <i>With <math>BH_4^-</math> anion as reductant in water</i>                                                                                                                                       |      |       |        |       |         |         |            |            |            |         |         |        |        |
| <i>In neutral water (pH = 7), <math>H_2</math> release is prevented by a sizeable barrier (<b>aTS1</b>) of 29.4 kcal/mol, partially due to low <math>H^+</math> concentration (+9.5 kcal/mol)</i> |      |       |        |       |         |         |            |            |            |         |         |        |        |
| $BH_4^- + H_5O_2^+$                                                                                                                                                                               | 0    | 57.25 | 63.03  | 31.31 | -210.42 | -164.82 | -180.56561 | -180.73637 | -180.94311 | 0.00    | 0.00    | 0.00   | 0.00   |
| <b>aTS1</b>                                                                                                                                                                                       | -724 | 57.41 | 62.93  | 38.44 | -29.89  | -19.04  | -180.77893 | -180.94538 | -180.91145 | -133.86 | -131.15 | 19.87  | 17.16  |
| $BH_3OH_2 + H_2O + H_2$                                                                                                                                                                           | 0    | 54.12 | 61.52  | 21.20 | -40.01  | -19.07  | -180.78372 | -180.95508 | -180.94566 | -136.87 | -137.24 | -1.60  | -1.23  |



|                                                                                                                                                              |       |       |       |       |         |         |            |            |            |        |        |        |        |
|--------------------------------------------------------------------------------------------------------------------------------------------------------------|-------|-------|-------|-------|---------|---------|------------|------------|------------|--------|--------|--------|--------|
| <i>Hydride transfer from borate anion BH<sub>4</sub><sup>-</sup> to CO<sub>2</sub> is facile over a moderate barrier (aTS1<sup>-</sup>) of 19.8 kcal/mol</i> |       |       |       |       |         |         |            |            |            |        |        |        |        |
| CO <sub>2</sub> + BH <sub>4</sub> <sup>-</sup>                                                                                                               | 0     | 28.61 | 33.28 | 4.60  | -98.14  | -78.85  | -215.98992 | -216.20104 | -216.31334 | 0.00   | 0.00   | 0.00   | 0.00   |
| <b>aTS1<sup>-</sup></b>                                                                                                                                      | 0     | 28.62 | 33.27 | 10.09 | -67.32  | -59.65  | -216.00098 | -216.20581 | -216.28177 | -6.94  | -2.99  | 19.81  | 15.87  |
| HCO <sub>2</sub> BH <sub>3</sub> <sup>-</sup>                                                                                                                | 0     | 32.89 | 36.46 | 16.16 | -80.79  | -66.80  | -216.03468 | -216.24725 | -216.32494 | -28.08 | -29.00 | -7.28  | -6.37  |
| <i>..followed by facile S<sub>N</sub>2 replacement with H<sub>2</sub>O to release formate anion HCO<sub>2</sub><sup>-</sup></i>                              |       |       |       |       |         |         |            |            |            |        |        |        |        |
| HCO <sub>2</sub> BH <sub>3</sub> <sup>-</sup> + H <sub>2</sub> O                                                                                             | 0     | 45.87 | 51.82 | 18.06 | -91.85  | -68.73  | -292.50806 | -292.79706 | -292.87480 | 0.00   | 0.00   | 0.00   | 0.00   |
| <b>aTS2<sup>-</sup></b>                                                                                                                                      | 305i  | 46.75 | 52.53 | 26.60 | -126.22 | -93.71  | -292.45363 | -292.73769 | -292.84162 | 34.15  | 37.26  | 20.82  | 17.71  |
| HCO <sub>2</sub> <sup>-</sup> + BH <sub>3</sub> OH <sub>2</sub>                                                                                              | 0     | 47.38 | 52.80 | 18.21 | -146.06 | -104.80 | -292.45074 | -292.73853 | -292.87050 | 35.97  | 36.73  | 2.70   | 1.94   |
| HCO <sub>2</sub> H + BH <sub>3</sub> OH <sup>-</sup>                                                                                                         | 0     | 46.51 | 51.90 | 16.98 | -118.81 | -90.06  | -292.47125 | -292.76020 | -292.87064 | 23.10  | 23.13  | 2.61   | 2.57   |
| <i>..and facile hydride transfer from BH<sub>3</sub>OH<sup>-</sup> to CO<sub>2</sub></i>                                                                     |       |       |       |       |         |         |            |            |            |        |        |        |        |
| CO <sub>2</sub> + BH <sub>3</sub> OH <sup>-</sup>                                                                                                            | 0     | 32.97 | 38.01 | 5.57  | -106.58 | -81.69  | -291.29355 | -291.58219 | -291.69746 | 0.00   | 0.00   | 0.00   | 0.00   |
| <b>aTS3<sup>-</sup></b>                                                                                                                                      | 396i  | 32.98 | 37.68 | 14.02 | -79.51  | -65.07  | -291.31018 | -291.59383 | -291.67218 | -10.44 | -7.31  | 15.86  | 12.73  |
| HCO <sub>2</sub> <sup>-</sup> + BH <sub>2</sub> OH                                                                                                           | 0     | 34.41 | 39.38 | 5.95  | -127.81 | -90.61  | -291.29757 | -291.58827 | -291.71716 | -2.52  | -3.81  | -12.36 | -11.07 |
| HCO <sub>2</sub> BH <sub>2</sub> OH <sup>-</sup>                                                                                                             | 0     | 36.66 | 40.88 | 18.59 | -94.09  | -72.43  | -291.35084 | -291.64173 | -291.72452 | -35.95 | -37.36 | -16.98 | -15.58 |
| <i>Water-aided hydrolysis of BH<sub>3</sub> is facile for the first B-H bond to release H<sub>2</sub>.</i>                                                   |       |       |       |       |         |         |            |            |            |        |        |        |        |
| BH <sub>3</sub> .OH <sub>2</sub> + 2H <sub>2</sub> O                                                                                                         | 0     | 60.77 | 68.47 | 23.97 | -50.38  | -22.30  | -256.07651 | -256.32895 | -256.32328 | 0.00   | 0.00   | 0.00   | 0.00   |
| BH <sub>3</sub> OH <sup>-</sup> + H <sub>3</sub> O <sub>2</sub> <sup>+</sup>                                                                                 | 0     | 61.61 | 67.75 | 32.28 | -218.86 | -167.65 | -255.86924 | -256.11752 | -256.32722 | 130.07 | 132.67 | -2.48  | -5.08  |
| BH <sub>3</sub> .OH <sub>2</sub>                                                                                                                             | 0     | 34.80 | 37.76 | 20.17 | -28.27  | -18.44  | -103.12975 | -103.22932 | -103.22355 | 0.00   | 0.00   | 0.00   | 0.00   |
| <b>aTS4</b> – 2H <sub>2</sub> O                                                                                                                              | 844i  | 36.22 | 36.62 | 39.56 | -5.86   | -12.45  | -103.15535 | -103.24283 | -103.19662 | -16.06 | -8.48  | 16.90  | 9.31   |
| <b>aTS4a</b> – H <sub>2</sub> O                                                                                                                              | 1005i | 33.90 | 35.21 | 28.38 | -15.90  | -13.14  | -103.12913 | -103.22007 | -103.19278 | 0.39   | 5.80   | 19.31  | 13.89  |
| <b>aTS4b</b>                                                                                                                                                 | 1503i | 31.49 | 34.19 | 17.04 | -9.48   | -5.38   | -103.09854 | -103.19408 | -103.17250 | 19.59  | 22.12  | 32.04  | 29.51  |
| BH <sub>2</sub> OH + H <sub>2</sub>                                                                                                                          | 0     | 28.16 | 32.74 | 7.04  | -10.70  | -2.95   | -103.15717 | -103.25500 | -103.24245 | -17.21 | -16.11 | -11.86 | -12.96 |
| <i>..also facile for the second BH bond</i>                                                                                                                  |       |       |       |       |         |         |            |            |            |        |        |        |        |
| BH <sub>2</sub> OH + H <sub>2</sub> O                                                                                                                        | 0     | 34.81 | 39.69 | 9.81  | -21.08  | -6.18   | -178.44996 | -178.62887 | -178.62007 | 0.00   | 0.00   | 0.00   | 0.00   |
| BH <sub>2</sub> OH.OH <sub>2</sub>                                                                                                                           | 0     | 38.49 | 42.04 | 22.30 | -32.81  | -20.32  | -178.45208 | -178.62951 | -178.62334 | -1.33  | -0.40  | -2.05  | -2.98  |
| BH <sub>2</sub> OH.OH <sub>2</sub> + 2H <sub>2</sub> O                                                                                                       | 0     | 64.46 | 72.76 | 26.10 | -54.92  | -24.18  | -331.39884 | -331.72914 | -331.72306 | 0.00   | 0.00   | 0.00   | 0.00   |
| BH <sub>2</sub> (OH) <sub>2</sub> <sup>-</sup> + H <sub>3</sub> O <sub>2</sub> <sup>+</sup>                                                                  | 0     | 65.72 | 72.40 | 34.75 | -232.38 | -172.61 | -331.18862 | -331.51492 | -331.72860 | 131.92 | 134.42 | -3.48  | -5.98  |
| <i>..via H<sub>2</sub>-release from BH<sub>2</sub>OH.OH<sub>2</sub> complex mediated by two additional H<sub>2</sub>O (via <b>TS5a</b>)</i>                  |       |       |       |       |         |         |            |            |            |        |        |        |        |
| BH <sub>2</sub> OH.OH <sub>2</sub>                                                                                                                           | 0     | 38.49 | 42.04 | 22.30 | -32.81  | -20.32  | -178.45208 | -178.62951 | -178.62334 | 0.00   | 0.00   | 0.00   | 0.00   |
| <b>TS5a</b> - 2H <sub>2</sub> O                                                                                                                              | 749i  | 39.27 | 40.38 | 41.52 | -21.05  | -19.76  | -178.47060 | -178.63643 | -178.59875 | -11.62 | -4.34  | 15.43  | 8.15   |
| <b>TS5b</b> - H <sub>2</sub> O                                                                                                                               | 1016i | 37.22 | 39.15 | 30.51 | -27.81  | -19.65  | -178.44573 | -178.61453 | -178.59422 | 3.99   | 9.40   | 18.27  | 12.86  |

|                                                                                                                                          |   |        |        |        |        |        |            |            |            |        |        |        |        |
|------------------------------------------------------------------------------------------------------------------------------------------|---|--------|--------|--------|--------|--------|------------|------------|------------|--------|--------|--------|--------|
| BH(OH) <sub>2</sub> + H <sub>2</sub>                                                                                                     | 0 | 32.31  | 37.26  | 9.72   | -17.66 | -7.10  | -178.49741 | -178.67535 | -178.66515 | -28.45 | -28.77 | -26.24 | -25.92 |
| <i>..and can be easily replaced by water from BH<sub>3</sub>.Thf, leading to facile hydrolysis of BH bonds for H<sub>2</sub> release</i> |   |        |        |        |        |        |            |            |            |        |        |        |        |
| BH <sub>3</sub> .THF + H <sub>2</sub> O                                                                                                  | 0 | 106.06 | 113.14 | 76.40  | -25.30 | -10.17 | -335.74653 | -336.08403 | -335.97547 | 0.00   | 0.00   | 0.00   | 0.00   |
| BH <sub>3</sub> .OH <sub>2</sub> + THF                                                                                                   | 0 | 107.09 | 113.65 | 75.55  | -39.45 | -22.01 | -335.73356 | -336.07140 | -335.98007 | 8.14   | 7.92   | -2.88  | -2.67  |
| <i>THF is not bound to borane BH<sub>2</sub>OH in water</i>                                                                              |   |        |        |        |        |        |            |            |            |        |        |        |        |
| BH <sub>2</sub> OH + THF                                                                                                                 | 0 | 94.12  | 100.23 | 63.29  | -21.20 | -7.82  | -334.58040 | -334.92113 | -334.82672 | 0.00   | 0.00   | 0.00   | 0.00   |
| BH <sub>2</sub> OH.THf                                                                                                                   | 0 | 96.66  | 102.10 | 76.89  | -22.15 | -11.46 | -334.59265 | -334.93190 | -334.82462 | -7.69  | -6.76  | 1.32   | 0.39   |
| <i>..while H<sub>2</sub>O is bound by 2.1 kcal/mol</i>                                                                                   |   |        |        |        |        |        |            |            |            |        |        |        |        |
| BH <sub>2</sub> OH + H <sub>2</sub> O                                                                                                    | 0 | 34.81  | 39.69  | 9.81   | -21.08 | -6.18  | -178.44996 | -178.62887 | -178.62007 | 0.00   | 0.00   | 0.00   | 0.00   |
| BH <sub>2</sub> OH.OH <sub>2</sub>                                                                                                       | 0 | 38.49  | 42.04  | 22.30  | -32.81 | -20.32 | -178.45208 | -178.62951 | -178.62334 | -1.33  | -0.40  | -2.05  | -2.98  |
| <i>..and NH<sub>3</sub> is bound even stronger, thus may stabilize borane in water</i>                                                   |   |        |        |        |        |        |            |            |            |        |        |        |        |
| BH <sub>2</sub> OH + NH <sub>3</sub> .OH <sub>2</sub>                                                                                    | 0 | 57.92  | 64.75  | 27.43  | -35.85 | -18.86 | -235.04796 | -235.28391 | -235.26422 | 0.00   | 0.00   | 0.00   | 0.00   |
| HOBH <sub>2</sub> NH <sub>3</sub> + H <sub>2</sub> O                                                                                     | 0 | 60.31  | 66.12  | 33.13  | -39.81 | -21.82 | -235.06381 | -235.29879 | -235.27776 | -9.94  | -9.34  | -8.50  | -9.10  |
| <i>Effect of strong but bulky base Dbu in water</i>                                                                                      |   |        |        |        |        |        |            |            |            |        |        |        |        |
| <i>The S<sub>N</sub>2 replacement with Dbu is kinetically slower due to a high barrier (TS2b) of 30.8 kcal/mol</i>                       |   |        |        |        |        |        |            |            |            |        |        |        |        |
| Dbu + BH <sub>3</sub> NH <sub>3</sub>                                                                                                    | 0 | 196.18 | 205.61 | 160.92 | -41.88 | -24.43 | -545.67869 | -546.24797 | -546.02444 | 0.00   | 0.00   | 0.00   | 0.00   |
| <b>TS2b</b>                                                                                                                              | 0 | 193.90 | 204.19 | 168.30 | -22.54 | -11.00 | -545.66436 | -546.22910 | -545.97542 | 8.99   | 11.84  | 30.76  | 27.91  |
| Dbu.BH <sub>3</sub> + NH <sub>3</sub>                                                                                                    | 0 | 194.73 | 204.71 | 161.16 | -38.49 | -20.29 | -545.69302 | -546.26305 | -546.03255 | -9.00  | -9.47  | -5.09  | -4.62  |
| <i>..with Dbu being 13.0 kcal/mol more basic than NH<sub>3</sub> in water</i>                                                            |   |        |        |        |        |        |            |            |            |        |        |        |        |
| DbuH <sup>+</sup> + NH <sub>3</sub> .OH <sub>2</sub>                                                                                     | 0 | 197.49 | 208.56 | 159.50 | -74.38 | -56.11 | -595.89061 | -596.51259 | -596.34181 | 0.00   | 0.00   | 0.00   | 0.00   |
| Dbu + NH <sub>4</sub> <sup>+</sup> .OH <sub>2</sub>                                                                                      | 0 | 198.69 | 209.02 | 161.54 | -94.04 | -77.36 | -595.84253 | -596.46136 | -596.32118 | 30.17  | 32.15  | 12.95  | 10.96  |
| <i>..and Dbu is still bound to borane BH<sub>2</sub>OH</i>                                                                               |   |        |        |        |        |        |            |            |            |        |        |        |        |
| Dbu + BH <sub>2</sub> OH                                                                                                                 | 0 | 174.22 | 183.29 | 139.03 | -33.63 | -13.33 | -564.37735 | -564.96838 | -564.76204 | 0.00   | 0.00   | 0.00   | 0.00   |
| Dbu.BH <sub>2</sub> OH                                                                                                                   | 0 | 177.45 | 185.77 | 154.30 | -37.36 | -20.44 | -564.40693 | -564.99728 | -564.78095 | -18.56 | -18.14 | -11.86 | -12.28 |
| <i>..but not bound to borane BH(OH)<sub>2</sub> in water</i>                                                                             |   |        |        |        |        |        |            |            |            |        |        |        |        |
| Dbu + BH(OH) <sub>2</sub>                                                                                                                | 0 | 178.38 | 187.80 | 141.71 | -40.59 | -17.48 | -639.71759 | -640.38873 | -640.18474 | 0.00   | 0.00   | 0.00   | 0.00   |
| Dbu.BH(OH) <sub>2</sub>                                                                                                                  | 0 | 180.36 | 189.61 | 156.22 | -41.01 | -20.92 | -639.73097 | -640.40147 | -640.18285 | -8.40  | -8.00  | 1.18   | 0.78   |

**Table S2.** TPSS-D3/def2-TZVP + COSMO optimized Cartesian coordinates (in Å) in water solution. Each structure is labeled by the specific name (See also **Table S1** and main-text figures), followed by the number of atoms, the total energy, and the detailed atomic coordinates (in double-column text list).

|                                                                                         |            |            |            |                                                                  |  |                                    |  |  |  |
|-----------------------------------------------------------------------------------------|------------|------------|------------|------------------------------------------------------------------|--|------------------------------------|--|--|--|
| <b>(BH<sub>2</sub>NH<sub>2</sub>)<sub>3</sub> : BH<sub>2</sub>NH<sub>2</sub> trimer</b> |            |            |            | C -0.0005018 -1.2365606 1.4079386                                |  |                                    |  |  |  |
| 18                                                                                      |            |            |            | H 0.0018448 -0.9894806 2.4720849                                 |  |                                    |  |  |  |
| Energy = -246.3690482353                                                                |            |            |            | H -0.8919095 -1.8323477 1.1923408                                |  |                                    |  |  |  |
| B                                                                                       | -1.4087080 | 0.6640462  | 0.2762259  | H 0.8880599 -1.8353543 1.1890925                                 |  |                                    |  |  |  |
| H                                                                                       | -2.4032518 | 1.1329076  | -0.2440978 | C -0.0005410 1.2344449 1.4123752                                 |  |                                    |  |  |  |
| H                                                                                       | -1.4524526 | 0.6849797  | 1.4865752  | H -0.8895460 1.2721846 2.0538186                                 |  |                                    |  |  |  |
| N                                                                                       | -1.2124548 | -0.8414228 | -0.1972049 | H 0.8875168 1.2723760 2.0551197                                  |  |                                    |  |  |  |
| H                                                                                       | -1.3119824 | -0.9109651 | -1.2137237 | H -0.0001732 2.0999349 0.7477837                                 |  |                                    |  |  |  |
| H                                                                                       | -1.9980970 | -1.3866400 | 0.1631911  |                                                                  |  |                                    |  |  |  |
| B                                                                                       | 0.1291485  | -1.5520163 | 0.2764348  | <b>BH<sub>2</sub>(OH)<sub>2</sub><sup>-</sup> : borate anion</b> |  |                                    |  |  |  |
| H                                                                                       | 0.2202396  | -2.6478008 | -0.2438167 | 7                                                                |  |                                    |  |  |  |
| H                                                                                       | 0.1334118  | -1.6001058 | 1.4867640  | Energy = -178.0035467822                                         |  |                                    |  |  |  |
| N                                                                                       | 1.3347818  | -0.6293511 | -0.1974161 | B 0.0004169 0.6685633 -0.1283136                                 |  |                                    |  |  |  |
| H                                                                                       | 2.1997927  | -1.0370401 | 0.1629915  | H 0.0142857 1.3354139 0.9278756                                  |  |                                    |  |  |  |
| H                                                                                       | 1.4449112  | -0.6809801 | -1.2139396 | H 0.2870663 1.3813479 -1.0983088                                 |  |                                    |  |  |  |
| B                                                                                       | 1.2794849  | 0.8878182  | 0.2763128  | O 1.0441748 -0.4050630 -0.0703041                                |  |                                    |  |  |  |
| H                                                                                       | 1.3190186  | 0.9153788  | 1.4866445  | H 0.9990839 -0.8588708 0.7848819                                 |  |                                    |  |  |  |
| H                                                                                       | 2.1828800  | 1.5146992  | -0.2438580 | O -1.3791822 0.1420112 -0.3832330                                |  |                                    |  |  |  |
| N                                                                                       | -0.1224204 | 1.4706948  | -0.1974452 | H -1.7418428 -0.2334267 0.4333719                                |  |                                    |  |  |  |
| H                                                                                       | -0.2018682 | 2.4236897  | 0.1629799  |                                                                  |  |                                    |  |  |  |
| H                                                                                       | -0.1324398 | 1.5921450  | -1.2139356 | <b>BH<sub>2</sub>OH.THF : unstable THF adduct of borane</b>      |  |                                    |  |  |  |
| <b>BH<sub>2</sub>NH<sub>2</sub> : transient aminoborane</b>                             |            |            |            | 18                                                               |  |                                    |  |  |  |
| 6                                                                                       |            |            |            | Energy = -334.5862759891                                         |  |                                    |  |  |  |
| Energy = -82.09624344404                                                                |            |            |            | O -0.4356952 -0.1893230 1.1717805                                |  |                                    |  |  |  |
| B                                                                                       | 0.0000504  | 0.0000065  | -0.7828147 | C -0.2578680 1.0959170 0.4419894                                 |  |                                    |  |  |  |
| H                                                                                       | 0.0000054  | 1.0457937  | -1.3675041 | C 0.2689787 0.7023118 -0.9342656                                 |  |                                    |  |  |  |
| H                                                                                       | -0.0000584 | -1.0457951 | -1.3675051 | C -0.2346587 -0.7398829 -1.1067065                               |  |                                    |  |  |  |
| N                                                                                       | 0.0000648  | -0.0000018 | 0.6061148  | C -0.0520540 -1.3124268 0.2863067                                |  |                                    |  |  |  |
| H                                                                                       | 0.0000082  | -0.8436869 | 1.1675195  | H 0.4311698 1.7069662 1.0263396                                  |  |                                    |  |  |  |
| H                                                                                       | -0.0000705 | 0.8436834  | 1.1675087  | H -1.2452705 1.5594782 0.4115255                                 |  |                                    |  |  |  |
| <b>BH<sub>2</sub>NH<sub>3</sub><sup>+</sup> : cation from hydride transfer</b>          |            |            |            | H 1.3628979 0.7236255 -0.9438171                                 |  |                                    |  |  |  |
| 7                                                                                       |            |            |            | H -0.0995614 1.3774907 -1.7097508                                |  |                                    |  |  |  |
| Energy = -82.51079979808                                                                |            |            |            | H -1.2918838 -0.7529099 -1.3900672                               |  |                                    |  |  |  |
| B                                                                                       | -0.7885745 | -0.0229234 | -0.3100080 | H 0.3362575 -1.3014433 -1.8498794                                |  |                                    |  |  |  |
| H                                                                                       | -1.3059147 | 1.0217209  | -0.5011621 | H -0.7066839 -2.1437328 0.5420264                                |  |                                    |  |  |  |
| H                                                                                       | -1.3056756 | -1.0843659 | -0.3472536 | H 0.9904123 -1.5649739 0.5052881                                 |  |                                    |  |  |  |
| N                                                                                       | 0.7074073  | -0.0019007 | -0.0252353 | B 0.2091199 -0.2171527 2.7060037                                 |  |                                    |  |  |  |
| H                                                                                       | 1.2137051  | -0.0696495 | -0.9234902 | H 1.4060248 -0.1227652 2.5043124                                 |  |                                    |  |  |  |
| H                                                                                       | 1.0374407  | 0.8657433  | 0.4108693  | H -0.3177781 0.7649720 3.1924719                                 |  |                                    |  |  |  |
| H                                                                                       | 1.0369291  | -0.7946970 | 0.5358802  | O -0.1286543 -1.4862937 3.2797182                                |  |                                    |  |  |  |
| <b>BH<sub>2</sub>NMe<sub>2</sub> : transient aminoborane</b>                            |            |            |            | H -1.0319658 -1.4898032 3.6302346                                |  |                                    |  |  |  |
| 12                                                                                      |            |            |            | <b>BH<sub>2</sub>OH : borane</b>                                 |  |                                    |  |  |  |
| Energy = -160.7505876654                                                                |            |            |            | 5                                                                |  |                                    |  |  |  |
| B                                                                                       | 0.0011708  | 0.0043940  | -0.7788880 | Energy = -101.9752070405                                         |  |                                    |  |  |  |
| H                                                                                       | 0.0014102  | 1.0493078  | -1.3662432 | B 0.7136038 0.0062622 0.0767498                                  |  |                                    |  |  |  |
| H                                                                                       | 0.0016963  | -1.0462504 | -1.3574976 | H 1.2207871 1.0852808 0.1974580                                  |  |                                    |  |  |  |
| N                                                                                       | 0.0002374  | 0.0073747  | 0.6095717  | H 1.3430759 -1.0116425 0.0964637                                 |  |                                    |  |  |  |
|                                                                                         |            |            |            |                                                                  |  | O -0.6280385 -0.1218878 -0.0916837 |  |  |  |
|                                                                                         |            |            |            |                                                                  |  | H -1.1044552 0.7258091 -0.1026020  |  |  |  |

MeOBH<sub>2</sub>NH<sub>3</sub> : alkoxy-substituted

12

Energy = -197.9258970825

|   |            |            |            |
|---|------------|------------|------------|
| O | 1.3157514  | -0.2275530 | -0.0093465 |
| B | 0.1890350  | 0.7069513  | -0.0714239 |
| H | 0.1260746  | 1.4642170  | 0.8939852  |
| H | 0.1236387  | 1.3272037  | -1.1300626 |
| N | -1.1152927 | -0.2410865 | -0.0059020 |
| H | -1.9817296 | 0.2987903  | -0.0456880 |
| H | -1.1462065 | -0.7901461 | 0.8560864  |
| H | -1.1433698 | -0.9061664 | -0.7820382 |
| C | 2.5849804  | 0.4060399  | -0.0484565 |
| H | 2.7157325  | 1.0964139  | 0.8010178  |
| H | 3.3619837  | -0.3643932 | 0.0015066  |
| H | 2.7176974  | 0.9828104  | -0.9785147 |

BH<sub>3</sub>NH<sub>2</sub><sup>-</sup> : anion from *N*-deprotonation

7

Energy = -82.78981351946

|   |            |            |            |
|---|------------|------------|------------|
| B | -0.8362612 | 0.0132696  | -0.0091548 |
| H | -1.2686346 | 0.0925217  | 1.1490709  |
| H | -1.3368352 | 0.9618312  | -0.6553901 |
| H | -1.2690374 | -1.0354487 | -0.5066916 |
| N | 0.7245490  | -0.0232780 | 0.0156802  |
| H | 1.1079678  | -0.0673716 | -0.9305855 |
| H | 1.1082362  | 0.8398694  | 0.4056270  |

BH<sub>3</sub>NH<sub>3</sub>.OH<sub>2</sub> : loose H-bonded

11

Energy = -159.7759548914

|   |            |            |            |
|---|------------|------------|------------|
| B | -2.4205671 | 0.9226756  | -1.4211752 |
| H | -3.4281621 | 0.4229124  | -0.9541916 |
| H | -2.1216064 | 1.9522703  | -0.8429375 |
| H | -1.4944594 | 0.1319450  | -1.4364291 |
| N | -2.7462265 | 1.3058827  | -2.9578979 |
| H | -3.0090704 | 0.4752139  | -3.5158393 |
| H | -3.5156393 | 1.9746502  | -3.0320154 |
| H | -1.9463392 | 1.7394758  | -3.4234813 |
| O | -3.4527656 | -1.1715876 | -4.4018312 |
| H | -2.7237389 | -1.7971902 | -4.2547469 |
| H | -4.2097218 | -1.5698570 | -3.9403736 |

BH<sub>3</sub>NH<sub>3</sub> : ammonia borane

8

Energy = -83.29471634154

|   |            |            |            |
|---|------------|------------|------------|
| B | -0.9052404 | 0.0000137  | 0.0000280  |
| H | -1.2622537 | 0.0861285  | 1.1607809  |
| H | -1.2622369 | 0.9621928  | -0.6549765 |
| H | -1.2621776 | -1.0483009 | -0.5057737 |
| N | 0.7154744  | 0.0000129  | 0.0000668  |
| H | 1.1032084  | -0.0697793 | -0.9424343 |
| H | 1.1032105  | 0.8511258  | 0.4108650  |
| H | 1.1030791  | -0.7813375 | 0.5318249  |

BH<sub>3</sub>NHMe<sub>2</sub> : *N*-methylated ammonia borane

14

Energy = -161.9522049343

|   |            |            |            |
|---|------------|------------|------------|
| B | -0.8925241 | 0.0023213  | 0.0075149  |
| H | -1.2542236 | 0.0927513  | 1.1671375  |
| H | -1.2354527 | 0.9647756  | -0.6544841 |
| H | -1.2388539 | -1.0494010 | -0.4984028 |
| N | 0.7264501  | 0.0014740  | 0.0320399  |
| H | 1.0483659  | -0.0724194 | -0.9356034 |
| C | 1.2811784  | 1.2729668  | 0.5835338  |
| H | 2.3733758  | 1.2486297  | 0.5550101  |
| H | 0.9052085  | 2.1042697  | -0.0131726 |
| H | 0.9355344  | 1.3734562  | 1.6138927  |
| C | 1.2772122  | -1.1741345 | 0.7690723  |
| H | 0.8989716  | -2.0846514 | 0.3039402  |
| H | 2.3694641  | -1.1575176 | 0.7379763  |
| H | 0.9309686  | -1.1174479 | 1.8025387  |

BH<sub>3</sub>OCO<sub>2</sub>H<sup>-</sup> : borane bicarbonate anion adduct

9

Energy = -291.4009584996

|   |            |            |            |
|---|------------|------------|------------|
| B | -1.9973102 | 0.0011029  | -0.0003273 |
| H | -2.1220314 | 0.6850600  | 1.0067295  |
| H | -2.1245719 | 0.6828841  | -1.0086475 |
| H | -2.7860460 | -0.9332462 | 0.0015559  |
| O | -0.6003942 | -0.6712217 | -0.0016374 |
| C | 0.4716794  | 0.0619732  | 0.0002351  |
| O | 0.5638996  | 1.2882911  | 0.0033956  |
| O | 1.5856658  | -0.7418660 | -0.0015947 |
| H | 2.3577717  | -0.1471493 | 0.0008388  |

BH<sub>3</sub>OCO : borane CO<sub>2</sub> adduct

7

Energy = -215.3321365463

|   |            |            |            |
|---|------------|------------|------------|
| B | 1.9510064  | 0.4495244  | 0.0003583  |
| H | 1.6941568  | 1.0328684  | -1.0119278 |
| H | 1.8196142  | 1.0177998  | 1.0445196  |
| H | 2.6561854  | -0.5135217 | -0.0494967 |
| O | 0.2405598  | -0.5925171 | 0.1024175  |
| C | -0.8564032 | -0.1783038 | 0.0042578  |
| O | -1.9454824 | 0.2084791  | -0.0902257 |

BH<sub>3</sub>.OH<sub>2</sub> : borane water adduct

7

Energy = -103.1439334585

|   |            |            |            |
|---|------------|------------|------------|
| B | -0.9280118 | 0.0142522  | -0.0100603 |
| H | -1.2138676 | 0.0962567  | 1.1631896  |
| H | -1.2781911 | 0.9733738  | -0.6654805 |
| H | -1.2153204 | -1.0489947 | -0.5121456 |
| O | 0.7020887  | 0.0027774  | -0.0034792 |
| H | 1.0813188  | -0.0631677 | -0.8990825 |
| H | 1.0819680  | 0.8068958  | 0.3956144  |

BH<sub>3</sub>OH<sup>-</sup> : borate anion

6

Energy = -102.6869469525  
 B -0.8139242 0.0033328 -0.0207625  
 H -1.2139491 0.0925208 1.1447759  
 H -1.2827531 0.9574901 -0.6705030  
 H -1.2690279 -1.0471837 -0.5124438  
 O 0.6914984 0.0169248 0.0171518  
 H 1.0361722 -0.0485873 -0.8852768

BH<sub>3</sub>.THF : BH<sub>3</sub> and THF adduct

17

Energy = -259.2699515878  
 O -0.4422079 -0.1488731 1.1271746  
 C -0.1937529 1.1290674 0.3975917  
 C 0.2943250 0.7049088 -0.9840956  
 C -0.2273734 -0.7360703 -1.1313803  
 C -0.0484064 -1.2879041 0.2679243  
 H 0.5383740 1.6905884 0.9784497  
 H -1.1536206 1.6467157 0.3856103  
 H 1.3873610 0.7137306 -1.0198496  
 H -0.0845255 1.3713207 -1.7617238  
 H -1.2849536 -0.7440096 -1.4119707  
 H 0.3377561 -1.3124666 -1.8669699  
 H -0.7074693 -2.1111552 0.5406735  
 H 0.9929800 -1.5336163 0.4983322  
 B 0.0087631 -0.2066126 2.6499046  
 H 1.2222783 -0.0930515 2.6593195  
 H -0.5592769 0.7255813 3.1788303  
 H -0.3709389 -1.2894051 3.0433615

BH<sub>4</sub><sup>-</sup> : borate anion

5

Energy = -27.38674964591  
 B -1.3639611 -0.0000113 0.0002553  
 H -1.7720089 1.1574900 -0.0999143  
 H -1.7936394 -0.4980793 1.0411156  
 H -1.7572688 -0.6586405 -0.9629895  
 H -0.1327688 -0.0006448 0.0226229

BH(OH)<sub>2</sub>.NH<sub>3</sub> : unstable adduct

10

Energy = -233.9253996628  
 B -0.1870304 -0.4282313 0.0520072  
 H -0.4572791 -1.5525487 0.4548633  
 O -0.2307210 -0.4294530 -1.4060988  
 H 0.1624137 0.3887392 -1.7524345  
 O 1.0010465 0.1866657 0.6445779  
 H 1.7740882 -0.3807146 0.5095168  
 N -1.3859690 0.5494959 0.6079601  
 H -2.2957286 0.2801075 0.2303124  
 H -1.4630273 0.5241053 1.6269207  
 H -1.2293852 1.5264367 0.3455506

BH(OH)<sub>2</sub>.OH<sub>2</sub> : loose water adduct

9

Energy = -253.7955272862

B 0.7762479 -0.4683169 0.4167867  
 H 0.2794950 -1.2212371 1.1979685  
 O -0.0656231 0.2921809 -0.3586244  
 H 0.3945635 0.8900101 -0.9739978  
 O -2.8664024 0.6023744 -0.0183574  
 H -1.8976090 0.5043608 -0.1439479  
 H -3.2580220 0.1196258 -0.7633370  
 O 2.1270751 -0.3302702 0.2591382  
 H 2.6422587 -0.9072490 0.8453341

BH(OH)<sub>2</sub> : borane

6

Energy = -177.3147792428  
 B 0.7744730 -0.4633520 0.4116487  
 H 0.2840354 -1.2202678 1.1955408  
 O -0.0706219 0.2926208 -0.3557930  
 H 0.3970248 0.8849533 -0.9712587  
 O 2.1304674 -0.3294590 0.2584079  
 H 2.6386383 -0.9093775 0.8480595

BH(OH)<sub>3</sub><sup>-</sup> : borate anion

8

Energy = -253.3271145916  
 B -0.0215494 -0.0030741 -0.3909130  
 H -0.1205250 -0.0005069 -1.6394557  
 O 1.0927033 0.8572423 0.0812165  
 H 0.9016503 1.7727694 -0.1699959  
 O -1.3532265 0.4730492 0.0848556  
 H -1.3361747 0.4966658 1.0568462  
 O 0.3259101 -1.3469885 0.1363299  
 H -0.3912022 -1.9588282 -0.0854835

HOBHNH<sub>2</sub> : aminoborane

7

Energy = -157.4256939944  
 O 0.8837868 -1.1540612 -0.4881783  
 H 0.6364883 -1.4676165 0.3977560  
 B 1.6989115 -0.0336551 -0.4777148  
 H 2.0271361 0.3871174 -1.5498304  
 N 2.1405164 0.6061868 0.6919349  
 H 1.9072787 0.3116630 1.6332739  
 H 2.7359457 1.4235528 0.6677525

MeOBHNH<sub>2</sub>.HCO<sub>2</sub>H : loose HCO<sub>2</sub>H adduct

15

Energy = -386.6356839022  
 B -1.7677592 0.4585481 -0.3149657  
 H -1.6625836 0.8622232 -1.4366989  
 N -1.4515892 -0.9081200 -0.0129961  
 H -1.5028347 -1.5912032 -0.7624781  
 H 0.2660682 -0.9393319 0.3098889  
 H -1.7695551 -1.3075162 0.8671987  
 H 1.3464263 -0.4254483 -1.4614293  
 C 1.9615346 -0.6602723 -0.5765548  
 O 1.2639910 -0.9745849 0.5146942

|   |            |            |            |
|---|------------|------------|------------|
| O | 3.1782852  | -0.6349554 | -0.5906427 |
| O | -2.1143743 | 1.2818574  | 0.7145334  |
| C | -2.3384876 | 2.6884721  | 0.4897578  |
| H | -3.3324386 | 2.9399921  | 0.8678143  |
| H | -1.5828700 | 3.2522072  | 1.0432161  |
| H | -2.2736696 | 2.9266397  | -0.5764455 |

MeOBH<sub>2</sub>NH<sub>2</sub> : aminoborane  
10

Energy = -196.7463925354

|   |            |            |            |
|---|------------|------------|------------|
| B | -0.5781397 | 0.4140136  | -0.0043429 |
| H | -0.3998897 | 1.6005556  | -0.0163112 |
| N | -1.8835095 | -0.1043928 | 0.0018683  |
| H | -2.7042098 | 0.4853603  | -0.0041814 |
| H | -2.0949295 | -1.0952576 | 0.0122057  |
| O | 0.4892789  | -0.4623946 | 0.0022044  |
| C | 1.8281667  | 0.0708714  | 0.0027587  |
| H | 2.0078600  | 0.6599221  | 0.9083391  |
| H | 2.5143646  | -0.7784233 | -0.0198737 |
| H | 1.9948678  | 0.6974252  | -0.8798180 |

BO<sub>3</sub> : or B(OCHO)<sub>3</sub>

13  
Energy = -592.8200902380

|   |            |            |            |
|---|------------|------------|------------|
| B | 0.1459150  | 0.0670239  | 0.5306402  |
| O | 0.2803935  | 1.3859602  | 0.9193202  |
| O | 1.2492458  | -0.6405474 | 0.0957803  |
| O | -1.0918902 | -0.5437343 | 0.5795419  |
| C | -0.7706975 | 2.1632745  | 1.3535251  |
| C | 2.5158381  | -0.1038746 | 0.0185604  |
| C | -1.3132527 | -1.8485876 | 0.1966338  |
| O | -0.5844093 | 3.3031296  | 1.6815033  |
| H | -1.7366980 | 1.6442309  | 1.3606029  |
| O | 3.4330022  | -0.7734657 | -0.3709130 |
| H | 2.5777679  | 0.9437094  | 0.3370457  |
| O | -2.4137972 | -2.3221157 | 0.2728761  |
| H | -0.4165462 | -2.3666395 | -0.1642739 |

B(OH)<sub>2</sub>Of : or B(OH)<sub>2</sub>OCHO  
9

Energy = -366.0403007489

|   |            |            |            |
|---|------------|------------|------------|
| B | 0.1224877  | 0.1082686  | 0.5364658  |
| O | 0.3632688  | 1.3980721  | 0.9046353  |
| O | 1.1981373  | -0.6968513 | 0.0958545  |
| O | -1.1226618 | -0.4445507 | 0.5753514  |
| C | 2.4695023  | -0.2288694 | 0.0234306  |
| O | 3.3739679  | -0.9352838 | -0.3556703 |
| H | 2.5860885  | 0.8181177  | 0.3332732  |
| H | -0.4339139 | 1.8720248  | 1.1931334  |
| H | -1.1491092 | -1.3715615 | 0.2857533  |

B(OH)<sub>3</sub>.NH<sub>3</sub> : loose NH<sub>3</sub> adduct

11  
Energy = -309.2544097870

|   |            |            |           |
|---|------------|------------|-----------|
| B | -0.7678104 | -0.0187450 | 0.0267088 |
|---|------------|------------|-----------|

|   |            |            |            |
|---|------------|------------|------------|
| O | -2.1228109 | 0.2852528  | -0.0039217 |
| O | 0.1749705  | 0.9382404  | -0.1950306 |
| O | -0.4042357 | -1.3311971 | 0.2910017  |
| H | -2.2785107 | 1.2239446  | -0.1949965 |
| H | 1.1448309  | 0.6001955  | -0.1435036 |
| H | -1.1774939 | -1.9017614 | 0.4274558  |
| N | 2.7305020  | 0.1080760  | -0.0699142 |
| H | 2.7724385  | -0.9004784 | 0.0789333  |
| H | 3.2557474  | 0.2989934  | -0.9235923 |
| H | 3.2505729  | 0.5376140  | 0.6956752  |

B(OH)<sub>3</sub> : boric acid

7  
Energy = -252.6447631493

|   |            |            |            |
|---|------------|------------|------------|
| B | -0.0000353 | -0.0000399 | 0.0004253  |
| O | 1.3554852  | -0.2467016 | 0.0004547  |
| H | 1.5650945  | -1.1945953 | -0.0005894 |
| O | -0.8914225 | -1.0505950 | 0.0004256  |
| H | -1.8170629 | -0.7580184 | -0.0005633 |
| O | -0.4641026 | 1.2972742  | 0.0004156  |
| H | 0.2520436  | 1.9526760  | -0.0005685 |

BOHO<sub>2</sub> : or HOB(OCHO)<sub>2</sub>

11  
Energy = -479.4318166242

|   |            |            |            |
|---|------------|------------|------------|
| B | 0.1556085  | 0.1054071  | 0.5288712  |
| O | 0.3489036  | 1.3898120  | 0.8990754  |
| O | 1.2165186  | -0.6911099 | 0.0955587  |
| O | -1.1197528 | -0.4611107 | 0.5705749  |
| C | 2.5006454  | -0.2263384 | 0.0235727  |
| C | -1.3836358 | -1.7535546 | 0.2118508  |
| O | 3.3917784  | -0.9415229 | -0.3560469 |
| H | 2.6191032  | 0.8189661  | 0.3356633  |
| O | -2.5054363 | -2.1889229 | 0.2684503  |
| H | -0.5033840 | -2.3203558 | -0.1164059 |
| H | -0.4575487 | 1.8513570  | 1.1844554  |

Cl<sup>-</sup> : chloride anion

1  
Energy = -460.4091180604

|    |           |           |           |
|----|-----------|-----------|-----------|
| Cl | 0.0000000 | 0.0000000 | 0.0000000 |
|----|-----------|-----------|-----------|

CO<sub>2</sub> : carbon dioxide

3  
Energy = -188.6986489612

|   |            |            |            |
|---|------------|------------|------------|
| C | 0.0000179  | 0.0000101  | 0.0000008  |
| O | 1.1685142  | 0.0000318  | 0.0000684  |
| O | -1.1683972 | -0.0000353 | -0.0000663 |

Dbu.BH<sub>2</sub>OH : Dbu borane adduct

32  
Energy = -564.3963759449

|   |           |           |            |
|---|-----------|-----------|------------|
| C | 2.1688097 | 1.4026370 | -0.0970006 |
| C | 0.9672414 | 1.4840110 | 0.8747000  |
| C | 2.9876711 | 0.1174197 | 0.0590871  |

|   |            |            |            |
|---|------------|------------|------------|
| H | 1.8066043  | 1.5029946  | -1.1272941 |
| H | 2.8199171  | 2.2616663  | 0.0989664  |
| H | 1.2585311  | 1.0822956  | 1.8519922  |
| H | 0.6723000  | 2.5217114  | 1.0300868  |
| C | -0.2427742 | 0.7419389  | 0.3747661  |
| C | 2.1897833  | -1.1752668 | -0.1451069 |
| H | 3.4204596  | 0.1011254  | 1.0692560  |
| H | 3.8282420  | 0.1379020  | -0.6445556 |
| N | -0.2060091 | -0.6051868 | 0.4269514  |
| N | -1.2614488 | 1.4311557  | -0.1138097 |
| C | 1.0124290  | -1.3386251 | 0.8261475  |
| H | 2.8608818  | -2.0294691 | 0.0036665  |
| H | 1.8122640  | -1.2402363 | -1.1736270 |
| C | -1.3375763 | -1.4290907 | -0.0299068 |
| C | -2.4379161 | 0.7073194  | -0.6335412 |
| H | 1.3056974  | -1.0432348 | 1.8403467  |
| H | 0.7150526  | -2.3874664 | 0.8714965  |
| H | -1.3743322 | -2.3152706 | 0.6092098  |
| H | -1.1560153 | -1.7621985 | -1.0598686 |
| C | -2.6242026 | -0.6289395 | 0.0670738  |
| H | -3.3038153 | 1.3536381  | -0.4829092 |
| H | -2.3177907 | 0.5643627  | -1.7157316 |
| H | -3.4442995 | -1.1868447 | -0.3931667 |
| H | -2.8748724 | -0.4617897 | 1.1206242  |
| B | -1.2763418 | 3.0389092  | -0.2840330 |
| H | -1.0623693 | 3.5391663  | 0.8163613  |
| H | -2.4079202 | 3.2867407  | -0.6683754 |
| O | -0.3250223 | 3.4916089  | -1.3208053 |
| H | 0.5645639  | 3.6073997  | -0.9580330 |

Dbu.BH<sub>3</sub> : Dbu borane adduct

31

Energy = -489.0867973547

|   |            |            |            |
|---|------------|------------|------------|
| C | 2.2146521  | 1.3538532  | -0.0439385 |
| C | 1.0083580  | 1.4372681  | 0.9187765  |
| C | 3.0108935  | 0.0512386  | 0.0908085  |
| H | 1.8608230  | 1.4851108  | -1.0738239 |
| H | 2.8788909  | 2.1975565  | 0.1727496  |
| H | 1.2850888  | 1.0200788  | 1.8941643  |
| H | 0.7247607  | 2.4773875  | 1.0720329  |
| C | -0.2029280 | 0.7132115  | 0.3988029  |
| C | 2.1957997  | -1.2280082 | -0.1339878 |
| H | 3.4425171  | 0.0112895  | 1.1009692  |
| H | 3.8530398  | 0.0692425  | -0.6112855 |
| N | -0.1921726 | -0.6361913 | 0.4400186  |
| N | -1.2061993 | 1.4225458  | -0.0862687 |
| C | 1.0141387  | -1.3891356 | 0.8335741  |
| H | 2.8562676  | -2.0927291 | 0.0016872  |
| H | 1.8185320  | -1.2722951 | -1.1637593 |
| C | -1.3251958 | -1.4217260 | -0.0716153 |
| C | -2.4303998 | 0.7451802  | -0.5551166 |
| H | 1.3097314  | -1.1062789 | 1.8507563  |
| H | 0.7040057  | -2.4348418 | 0.8685664  |
| H | -1.3645901 | -2.3513940 | 0.5014653  |
| H | -1.1534013 | -1.6799046 | -1.1250097 |

|   |            |            |            |
|---|------------|------------|------------|
| C | -2.6058209 | -0.6200597 | 0.0903132  |
| H | -3.2692964 | 1.4018364  | -0.3141766 |
| H | -2.3871520 | 0.6592719  | -1.6484984 |
| H | -3.4409390 | -1.1504058 | -0.3753831 |
| H | -2.8293222 | -0.5023596 | 1.1566094  |
| B | -1.1868733 | 3.0030556  | -0.2582729 |
| H | -1.3550802 | 3.5461240  | 0.8293404  |
| H | -0.1308890 | 3.3631104  | -0.7532935 |
| H | -2.1147479 | 3.2692010  | -1.0049561 |

Dbu.H<sub>2</sub>O : H-bonded

30

Energy = -538.8706145503

|   |            |            |            |
|---|------------|------------|------------|
| C | 2.2253777  | 1.3189162  | -0.1422329 |
| C | 0.9942517  | 1.4995048  | 0.7739681  |
| C | 3.0133230  | 0.0294311  | 0.1168935  |
| H | 1.8984853  | 1.3616047  | -1.1895196 |
| H | 2.8940296  | 2.1731822  | 0.0152539  |
| H | 1.2536332  | 1.2065258  | 1.7995203  |
| H | 0.7044891  | 2.5521804  | 0.7929495  |
| C | -0.2189727 | 0.7357521  | 0.2958147  |
| C | 2.2058375  | -1.2631622 | -0.0468263 |
| H | 3.4062612  | 0.0628833  | 1.1433520  |
| H | 3.8826877  | -0.0011219 | -0.5514519 |
| N | -0.1946593 | -0.6226941 | 0.4184016  |
| N | -1.1914830 | 1.4306222  | -0.2273475 |
| C | 0.9918913  | -1.3515724 | 0.8902776  |
| H | 2.8605263  | -2.1163341 | 0.1702902  |
| H | 1.8631358  | -1.3767760 | -1.0834953 |
| C | -1.3279103 | -1.4298675 | -0.0561928 |
| C | -2.3658083 | 0.7193151  | -0.7422202 |
| H | 1.2677709  | -1.0035678 | 1.8940699  |
| H | 0.6786202  | -2.3934032 | 0.9889720  |
| H | -1.4084950 | -2.3045366 | 0.5965474  |
| H | -1.1313660 | -1.7910609 | -1.0756869 |
| C | -2.6066184 | -0.6030942 | -0.0176670 |
| H | -3.2321606 | 1.3819771  | -0.6379767 |
| H | -2.2343361 | 0.5356836  | -1.8190727 |
| H | -3.4239536 | -1.1639632 | -0.4821951 |
| H | -2.8812713 | -0.4047475 | 1.0251733  |
| O | -1.3920031 | 4.1264475  | -0.0042025 |
| H | -1.2924397 | 3.1166559  | -0.0905093 |
| H | -1.5544652 | 4.2730236  | 0.9406036  |

DbuH<sup>+</sup>.OH<sub>2</sub> : H-bonded

31

Energy = -539.3484080719

|   |            |           |            |
|---|------------|-----------|------------|
| C | 2.2199974  | 1.2918050 | -0.1398929 |
| C | 0.9774584  | 1.4747730 | 0.7625355  |
| C | 3.0141158  | 0.0146341 | 0.1545522  |
| H | 1.9090044  | 1.3180035 | -1.1917016 |
| H | 2.8701052  | 2.1577841 | 0.0210639  |
| H | 1.2224672  | 1.2039898 | 1.7960175  |
| H | 0.6698958  | 2.5229349 | 0.7641718  |
| C | -0.1981593 | 0.6621031 | 0.3031224  |

|   |            |            |            |
|---|------------|------------|------------|
| C | 2.2248514  | -1.2893982 | -0.0084165 |
| H | 3.3885374  | 0.0675781  | 1.1862690  |
| H | 3.8931424  | -0.0149821 | -0.4993128 |
| N | -0.1844821 | -0.6638345 | 0.4004574  |
| N | -1.2221827 | 1.3128712  | -0.2322567 |
| C | 1.0003762  | -1.3915354 | 0.9083000  |
| H | 2.8833625  | -2.1314313 | 0.2333118  |
| H | 1.9037519  | -1.4232297 | -1.0491532 |
| C | -1.3283129 | -1.4742746 | -0.0716253 |
| C | -2.4329819 | 0.6579243  | -0.7403144 |
| H | 1.2357269  | -1.0309254 | 1.9158318  |
| H | 0.6833387  | -2.4310163 | 0.9990785  |
| H | -1.3886782 | -2.3497527 | 0.5778315  |
| H | -1.1207129 | -1.8187689 | -1.0913910 |
| C | -2.6183878 | -0.6664424 | -0.0118518 |
| H | -3.2725640 | 1.3337240  | -0.5658447 |
| H | -2.3333625 | 0.5049551  | -1.8208510 |
| H | -3.4259459 | -1.2390546 | -0.4735700 |
| H | -2.8854533 | -0.4780268 | 1.0329638  |
| H | -1.1740170 | 2.3425572  | -0.2605083 |
| O | -1.2259327 | 4.1435022  | -0.3457787 |
| H | -0.5607102 | 4.6000720  | -0.8866306 |
| H | -1.2323252 | 4.6258420  | 0.4974545  |

DbuH<sup>+</sup> : N-protonated Dbu  
28

Energy = -462.8648172736

|   |            |            |            |
|---|------------|------------|------------|
| C | 2.2268202  | 1.3381491  | -0.1198438 |
| C | 0.9907561  | 1.5038390  | 0.7950507  |
| C | 3.0180242  | 0.0524557  | 0.1422054  |
| H | 1.9092885  | 1.3895643  | -1.1686264 |
| H | 2.8790573  | 2.1991030  | 0.0577844  |
| H | 1.2409382  | 1.2071622  | 1.8202291  |
| H | 0.6878283  | 2.5533128  | 0.8254994  |
| C | -0.1890488 | 0.7057504  | 0.3255846  |
| C | 2.2250177  | -1.2443103 | -0.0559400 |
| H | 3.3926619  | 0.0772090  | 1.1748723  |
| H | 3.8966303  | 0.0381811  | -0.5127179 |
| N | -0.1811825 | -0.6199072 | 0.3789142  |
| N | -1.2215179 | 1.3716114  | -0.1822736 |
| C | 1.0025803  | -1.3694677 | 0.8600775  |
| H | 2.8812377  | -2.0946520 | 0.1614243  |
| H | 1.9019565  | -1.3485632 | -1.0994347 |
| C | -1.3321028 | -1.4106918 | -0.1113827 |
| C | -2.4456692 | 0.7437993  | -0.6952226 |
| H | 1.2406013  | -1.0404334 | 1.8776836  |
| H | 0.6794861  | -2.4092357 | 0.9194782  |
| H | -1.3867037 | -2.3090228 | 0.5062540  |
| H | -1.1337902 | -1.7169583 | -1.1448762 |
| C | -2.6201237 | -0.6041468 | -0.0085758 |
| H | -3.2771850 | 1.4169288  | -0.4803019 |
| H | -2.3622697 | 0.6302660  | -1.7815477 |
| H | -3.4334047 | -1.1598594 | -0.4805364 |
| H | -2.8748224 | -0.4514378 | 1.0450029  |
| H | -1.1629490 | 2.3822190  | -0.1760516 |

Dbu : 1,8-Diazabicyclo[5.4.0]undec-7-ene  
27

Energy = -462.3809967830

|   |            |            |            |
|---|------------|------------|------------|
| C | 2.1975313  | 1.3549237  | -0.0716959 |
| C | 0.9770565  | 1.4899708  | 0.8663186  |
| C | 2.9939847  | 0.0580483  | 0.1158942  |
| H | 1.8558262  | 1.4435771  | -1.1115416 |
| H | 2.8673694  | 2.2028081  | 0.1143546  |
| H | 1.2528599  | 1.1597335  | 1.8765977  |
| H | 0.6783334  | 2.5387505  | 0.9293165  |
| C | -0.2419024 | 0.7438978  | 0.3709636  |
| C | 2.1886529  | -1.2298007 | -0.0912700 |
| H | 3.4036396  | 0.0463067  | 1.1364619  |
| H | 3.8526215  | 0.0620167  | -0.5671062 |
| N | -0.2064126 | -0.6252029 | 0.4484141  |
| N | -1.2155663 | 1.4596668  | -0.1124717 |
| C | 0.9932588  | -1.3620971 | 0.8656221  |
| H | 2.8517528  | -2.0884763 | 0.0731521  |
| H | 1.8253475  | -1.2978485 | -1.1250736 |
| C | -1.3239852 | -1.4190628 | -0.0767905 |
| C | -2.3840238 | 0.7513310  | -0.6496048 |
| H | 1.2901993  | -1.0506319 | 1.8757593  |
| H | 0.6900237  | -2.4098886 | 0.9328616  |
| H | -1.3954997 | -2.3324420 | 0.5226571  |
| H | -1.1237386 | -1.7184767 | -1.1162733 |
| C | -2.6119371 | -0.6102014 | 0.0056492  |
| H | -3.2622855 | 1.3934073  | -0.5121393 |
| H | -2.2581760 | 0.6220794  | -1.7358332 |
| H | -3.4257568 | -1.1542606 | -0.4854354 |
| H | -2.8859628 | -0.4701062 | 1.0584249  |

H<sub>2</sub>CO<sub>3</sub> : carbonic acid

6

Energy = -265.1719501371

|   |            |            |            |
|---|------------|------------|------------|
| C | 0.0070130  | -0.0454969 | 0.3442346  |
| O | 0.0728088  | -1.1114489 | -0.2395634 |
| O | 0.4680532  | 0.2061262  | 1.5797583  |
| H | 0.8650526  | -0.6161650 | 1.9236023  |
| O | -0.5393831 | 1.0831220  | -0.1353036 |
| H | -0.8735444 | 0.8954019  | -1.0325883 |

H<sub>2</sub>O.H<sub>2</sub>O : H-bonded water dimer

6

Energy = -152.9589854991

|   |           |            |            |
|---|-----------|------------|------------|
| O | 0.3694783 | 0.4592079  | -0.3092859 |
| O | 0.7734567 | 2.2949521  | 1.7574631  |
| H | 0.6790955 | 1.6379315  | 1.0256950  |
| H | 0.7013984 | -0.4225586 | -0.0714089 |
| H | 0.8739115 | 0.7012793  | -1.1037853 |
| H | 1.7264206 | 2.3283341  | 1.9358883  |

H<sub>2</sub>O : water

3

Energy = -76.47649206796



O 0.0000000 0.0000001 0.1370316  
H 0.0000000 0.7646592 -0.4614238  
H 0.0000000 -0.7646591 -0.4614238

H<sub>2</sub> : dihydrogen

2

Energy = -1.180150698198

H 0.0278424 0.0000000 0.0000000  
H 0.7721576 0.0000000 0.0000000

H<sub>5</sub>O<sub>2</sub><sup>+</sup> : proton bound to two H<sub>2</sub>O

7

Energy = -153.3879169353

O 0.4152649 0.6206513 -0.1677944  
O 0.7951201 2.0790810 1.7270849  
H 0.6493159 1.3656969 0.7581753  
H 0.5934300 -0.3091232 0.0679224  
H 0.9640246 0.8240463 -0.9479607  
H 1.7066054 2.4187940 1.7971388  
H 0.2063846 2.8561028 1.6901456

HBO<sub>2</sub>OH<sup>-</sup> : or HB(OCHO)<sub>2</sub>OH<sup>-</sup> anion

12

Energy = -480.1638432997

B 1.9775936 0.1505221 0.5565605  
H 1.9318856 -0.4491879 1.6150038  
O 2.7168096 1.4813905 0.7672252  
O 2.8214710 -0.5878749 -0.4586577  
O 0.7131305 0.3982830 -0.0937514  
C 3.2116798 1.7929657 1.9430983  
C 3.4554810 -1.6911554 -0.1245039  
O 3.8150092 2.8385247 2.1692093  
H 3.0397276 1.0374184 2.7303949  
O 4.1604992 -2.3239005 -0.9030036  
H 3.3023516 -2.0110329 0.9212612  
H 0.0408622 0.6646044 0.5502401

HBO<sub>3</sub><sup>-</sup> : or HB(OCHO)<sub>3</sub><sup>-</sup> anion

14

Energy = -593.5762295318

B 0.1163449 0.1179371 0.3644324  
H 0.3143635 -0.2421998 1.5009850  
O -0.4375950 1.5042004 0.2873906  
O 1.3604045 0.1228438 -0.4640932  
O -0.8570961 -0.7572960 -0.3568040  
C -0.6595700 2.1991312 1.3909111  
C 2.5187932 -0.2352161 0.0649777  
C -1.4026487 -1.7967615 0.2530400  
O -1.1108834 3.3347631 1.3817721  
H -0.4034585 1.6688672 2.3238685  
O 3.5639243 -0.2457109 -0.5682433  
H 2.4652407 -0.5250236 1.1281220  
O -2.2030788 -2.5422827 -0.2917990  
H -1.0755062 -1.9370885 1.2972680

HBO<sub>2</sub>(OH)<sub>2</sub><sup>-</sup> : or HB(OH)<sub>2</sub>OCHO<sup>-</sup>

10

Energy = -366.7481607644

B 1.9583547 0.0448285 0.5360999  
H 1.9011577 -0.4683022 1.6555139  
O 2.7537363 1.4077522 0.7438704  
O 2.6797887 -0.7388740 -0.4512711  
O 0.6718897 0.3818049 -0.0515565  
C 3.1825725 1.7616246 1.9227032  
O 3.8040444 2.8036123 2.1502968  
H 2.9483461 1.0477366 2.7334752  
H 3.4495411 -1.1640697 -0.0476993  
H 0.1221756 0.8593560 0.5861876

HCO<sub>2</sub>BH<sub>2</sub>NH<sub>3</sub> :

11

Energy = -272.0206287943

B 0.4358297 1.0102357 0.1241347  
H 1.6127425 1.0339352 0.4043293  
O 0.1151093 -0.1479188 -0.8014046  
N -0.3764961 0.7888432 1.4938734  
H 0.0254991 2.0173577 -0.4015502  
C 0.3969071 -1.3834711 -0.4392465  
H -0.0851132 -0.0870212 1.9378176  
H -1.3890667 0.7445024 1.3593074  
H -0.2008980 1.5454226 2.1583013  
O 0.8101001 -1.7358141 0.6625790  
H 0.2072445 -2.0998198 -1.2532791

HCO<sub>2</sub>BH<sub>2</sub>OH<sup>-</sup> : borate anion

9

Energy = -291.4265571247

B -1.2818009 0.5319057 0.4786271  
H -1.8103049 1.5740673 0.0945232  
H -1.5052704 0.2940870 1.6579754  
H -0.0101356 2.4418981 -0.7061644  
O -1.6407423 -0.6457936 -0.3156497  
H -1.6599791 -0.4282648 -1.2597455  
C 0.7539463 1.7809945 -0.2558299  
O 0.2673763 0.7603635 0.3990925  
O 1.9581763 2.0146442 -0.3729247

HCO<sub>2</sub>BH<sub>2</sub> : borane

7

Energy = -215.3672065106

B -1.4096597 -0.2600227 -0.0122770  
H -1.5726552 -1.4417687 0.0025640  
H -2.2835018 0.5453971 -0.0243240  
H 0.6537049 -1.6784714 0.0078871  
C 0.9499790 -0.6186933 -0.0030762  
O -0.1233550 0.2477631 -0.0160617  
O 2.0776060 -0.2056033 -0.0044100

HCO<sub>2</sub>BH<sub>3</sub><sup>-</sup> : borate anion

8

Energy = -216.1116335337  
 B -1.5227240 -0.2356396 0.3514929  
 H -1.9277379 -0.0307431 1.4884738  
 H -1.5665875 -1.4286824 0.0772358  
 H -2.1582882 0.4255591 -0.4595021  
 H 0.5838326 -1.6082927 -0.2176387  
 C 0.9123737 -0.5716829 -0.0146621  
 O -0.0547505 0.2502851 0.2914518  
 O 2.0982622 -0.2429458 -0.0780755

HCO<sub>2</sub>BH(OH)<sub>2</sub><sup>-</sup> : borate anion  
 10

Energy = -366.7476434738  
 B 0.9765919 0.0104339 0.4210625  
 H 0.7288112 0.0277547 1.6172940  
 H -1.4496545 0.0110031 1.3553741  
 O 1.6655084 -1.2358365 0.0874177  
 H 1.8547323 -1.2878147 -0.8634748  
 C -1.5260013 0.0066947 0.2528260  
 O -0.3816386 0.0071834 -0.3722543  
 O -2.6217378 0.0021221 -0.3133894  
 O 1.6785032 1.2399135 0.0543572  
 H 1.8787675 1.2591796 -0.8954398

HCO<sub>2</sub>BH(OH)NH<sub>3</sub> : ammonia borane  
 12

Energy = -347.3394558472  
 B 0.3785431 1.0295819 0.0526899  
 H 1.5681500 1.0811427 0.2721189  
 O -0.2165877 2.1821954 -0.5610072  
 H 0.4390716 2.7008108 -1.0471604  
 H -0.0773600 -0.0891507 1.8668052  
 C 0.3986951 -1.4117950 -0.4060179  
 O 0.8473843 -1.7144634 0.6986244  
 O 0.0579243 -0.2033137 -0.7989370  
 H 0.2281542 -2.1629816 -1.1927916  
 N -0.3848003 0.7964213 1.4511389  
 H -1.4015513 0.7555806 1.3414546  
 H -0.1852804 1.5442961 2.1180955

HCO<sub>2</sub><sup>-</sup>.H<sub>2</sub>O : H-bonded anion  
 7

Energy = -265.9062957125  
 O 2.3531971 0.1264598 0.1288482  
 H 2.4525980 -0.0948725 -0.8100600  
 H 1.3869076 -0.0705528 0.3355293  
 C -1.0176538 0.2897222 0.0384073  
 H -0.5582367 1.0129311 -0.6788606  
 O -0.1992898 -0.4045766 0.7225820  
 O -2.2702616 0.2458409 0.0855696

HCO<sub>2</sub>H : formic acid  
 5

Energy = -189.8826207797  
 C 0.0152341 -0.0600257 0.3532880

O 0.0858686 -1.1278553 -0.2206949  
 O 0.4793037 0.1831472 1.5903599  
 H 0.8798906 -0.6382260 1.9454193  
 H -0.4377838 0.8487180 -0.0634205

HCO<sub>2</sub><sup>-</sup> : formate anion  
 4

Energy = -189.4190669102  
 C 0.0000028 -0.0000501 0.3355594  
 H -0.0000010 0.0000216 1.4577606  
 O -0.0000009 1.1343085 -0.2182883  
 O -0.0000009 -1.1342800 -0.2182955

HCO<sub>3</sub><sup>-</sup>.H<sub>2</sub>O : H-bonded anion  
 8

Energy = -341.2010781715  
 C 0.8881879 0.1591687 0.9986311  
 O 1.6416580 1.1453033 0.8864499  
 O 0.8545539 -0.8891944 0.2757065  
 O -0.0282748 0.2257252 2.0545760  
 H -0.5642223 -0.6046505 2.0334585  
 O -1.0562782 -2.3255060 1.3703150  
 H -0.3236544 -1.9161544 0.8074151  
 H -1.8658486 -2.2360241 0.8423321

HCO<sub>3</sub><sup>-</sup> : bicarbonate anion  
 5

Energy = -264.7131829931  
 C 0.0000065 -0.0044980 0.3411523  
 O 0.0000850 1.1287024 -0.1889216  
 O -0.0000489 -1.1465206 -0.1848796  
 O -0.0002124 0.0247403 1.7599279  
 H 0.0001699 -0.9073601 2.0428825

HOBH<sub>2</sub>NH<sub>3</sub> : ammonia borane  
 9

Energy = -158.6054607474  
 O 1.3716285 -0.2728957 -0.0187749  
 H 1.5885433 -0.5306691 0.8891459  
 B 0.2362983 0.6488367 -0.0490562  
 H 0.1612623 1.4035774 0.9105856  
 H 0.1977623 1.2336382 -1.1194812  
 N -1.1571308 -0.2298620 -0.0021965  
 H -1.9864806 0.3626619 -0.0851404  
 H -1.2569953 -0.7564158 0.8684637  
 H -1.1993060 -0.9097587 -0.7646321

HOBH<sub>2</sub>.OH<sub>2</sub> : borane water adduct  
 8

Energy = -178.4622343539  
 B 0.5152800 -0.5791338 0.0346001  
 H 0.5647739 -0.9176025 1.1976710  
 H 0.8589546 -1.3949289 -0.7905481  
 O 0.9845028 0.7336817 -0.2800473  
 H 0.9302306 1.3302923 0.4815678

O -1.1835820 -0.6294245 -0.2028169  
H -1.6637572 -0.0583270 0.4250806  
H -1.4278449 -0.3138811 -1.0931082

HOBHO<sub>f</sub><sup>2-</sup> : or HOBH(OCHO)<sub>2</sub><sup>-</sup> anion  
12

Energy = -480.1645021533  
B 0.0773738 0.7896951 0.0083434  
H 0.1628153 0.7357300 1.2180106  
O -0.0306148 2.1514273 -0.4438421  
O -1.1046430 -0.0357272 -0.4931175  
H 2.1298430 -0.2423512 1.1607106  
H -0.1016458 2.2000096 -1.4108695  
C -1.9250139 -0.6154003 0.3540518  
O -2.9048422 -1.2677588 0.0073693  
H -1.6648419 -0.4694918 1.4169458  
C 2.2596540 -0.3685199 0.0716198  
O 1.2701449 0.1006344 -0.6540640  
O 3.2544136 -0.9049381 -0.4069624

HOBHO<sub>f</sub> : or borane HOBH(OCHO)  
8

Energy = -290.7086286819  
B -1.2425086 0.4651382 -0.0110578  
H -2.1639494 1.2147215 -0.0172966  
O -1.4266950 -0.8717648 -0.0465678  
O 0.0402046 1.0721914 0.0356740  
H -0.5611543 -1.3402633 -0.0352298  
C 1.1941430 0.3687622 0.0485660  
O 1.2753105 -0.8450502 0.0216383  
H 2.0607703 1.0394778 0.0868738

NH<sub>3</sub>.OH<sub>2</sub> : H-bonded  
7

Energy = -133.0747374482  
O 1.5143822 -0.1619973 0.2613739  
H 1.6461149 -0.7266562 -0.5178519  
H 1.8703344 0.7001773 -0.0096174  
N -1.6468592 0.2444338 0.2695028  
H -1.8827787 0.5244197 -0.6837601  
H -2.0657913 -0.6783641 0.3949243  
H -0.6314422 0.0990008 0.2786483

NH<sub>3</sub> : ammonia  
4

Energy = -56.59634858633  
N -1.3266738 0.0001256 0.0010138  
H -1.7250518 0.9368036 -0.0813918  
H -1.7425776 -0.4029151 0.8420993  
H -1.7128708 -0.5330141 -0.7796732

NH<sub>4</sub><sup>+</sup>HCO<sub>2</sub><sup>-</sup> : H-bonded contact ion pair  
9

Energy = -246.4998027258  
N 2.4575882 -0.0864573 0.0005833

H 2.9690934 -0.4115748 0.8225065  
H 2.9510369 -0.4009852 -0.8363490  
H 1.4151904 -0.4510924 0.0089351  
H 2.4366508 0.9351314 0.0070818  
C -0.7637975 0.1847549 -0.0010345  
O -0.0527589 -0.8811479 0.0228535  
O -0.3447548 1.3628975 -0.0332891  
H -1.8633924 0.0150917 0.0087040

NH<sub>4</sub><sup>+</sup>HCO<sub>3</sub><sup>-</sup>.H<sub>2</sub>O : H-bonded contact ion pair  
13

Energy = -398.2781447751  
N 2.4715123 -0.2043692 -0.0147057  
H 2.9233725 -0.2588060 0.8993515  
H 2.9815897 -0.8023839 -0.6666114  
H 1.4462123 -0.5126199 0.0516980  
H 2.4819718 0.7819658 -0.3570413  
C -1.0561743 -0.1152217 0.0455215  
O -0.1071222 -0.9457302 0.0758469  
O -0.6305941 1.2385974 0.0042618  
H -1.4396659 1.7816544 -0.0167144  
O -2.2837878 -0.3114149 0.0515150  
O 1.7686270 2.3895154 -0.8280377  
H 0.8470501 2.0893062 -0.6394824  
H 1.7981068 2.5258751 -1.7896050

NH<sub>4</sub><sup>+</sup>HCO<sub>3</sub><sup>-</sup> : H-bonded contact ion pair  
10

Energy = -321.7925286721  
N 2.3854238 -0.0564403 -0.0004050  
H 2.8978718 -0.3773021 0.8231627  
H 2.8806473 -0.3744356 -0.8355336  
H 1.3548818 -0.4369069 0.0094140  
H 2.3729911 0.9651479 0.0016720  
C -0.9708825 -0.0699835 0.0073985  
O -0.0755999 -0.9723388 0.0247377  
O -0.4433560 1.2264895 -0.0247585  
H -1.2043496 1.8350839 -0.0343962  
O -2.2078138 -0.2033130 0.0154412

NH<sub>4</sub><sup>+</sup>.OH<sub>2</sub> : H-bonded ammonium  
8

Energy = -133.5462065183  
O 1.4169754 0.0834343 -0.2514409  
H 1.8510520 -0.7744588 -0.1077970  
H 1.8480880 0.6861852 0.3777442  
N -1.3242641 0.0009188 -0.0007670  
H -1.7047242 0.9305126 -0.1906203  
H -1.6211467 -0.2914402 0.9324943  
H -1.7046651 -0.6545436 -0.6868017  
H -0.2698285 0.0195196 -0.0605495

OCH(OH)<sub>2</sub><sup>-</sup> : hydrogenated bicarbonate anion  
7

Energy = -265.8640606858

|   |            |            |            |
|---|------------|------------|------------|
| O | 1.1895512  | -0.6955347 | -0.0411443 |
| O | -0.0003712 | 1.2994181  | -0.1555016 |
| C | 0.0000394  | 0.1061158  | 0.3537517  |
| O | -1.1887774 | -0.6960648 | -0.0409297 |
| H | 1.4558595  | -0.2791624 | -0.8818498 |
| H | 0.0003920  | 0.0015787  | 1.4594467  |
| H | -1.4563577 | -0.2791847 | -0.8809090 |

THF : tetrahydrofuran

13

Energy = -232.5937965276

|   |            |            |            |
|---|------------|------------|------------|
| O | -0.0001678 | -0.0000229 | 1.2607277  |
| C | -0.0973574 | 1.1813074  | 0.4190380  |
| C | 0.2601563  | 0.7227481  | -0.9937539 |
| C | -0.2601908 | -0.7227564 | -0.9937716 |
| C | 0.0973454  | -1.1812878 | 0.4190159  |
| H | 0.5833139  | 1.9394326  | 0.8189156  |
| H | -1.1261437 | 1.5643024  | 0.4665298  |
| H | 1.3463401  | 0.7357989  | -1.1370812 |
| H | -0.2006797 | 1.3479246  | -1.7632811 |
| H | -1.3463770 | -0.7358339 | -1.1370474 |
| H | 0.2006852  | -1.3479324 | -1.7632702 |
| H | -0.5831407 | -1.9396027 | 0.8188665  |
| H | 1.1262163  | -1.5640786 | 0.4665620  |

**TS0a** : NH<sub>3</sub>-bridged H<sub>2</sub>-release from BH<sub>3</sub>NH<sub>3</sub>

12

Energy = -139.8493314817

|   |            |            |            |
|---|------------|------------|------------|
| B | -1.4588141 | 0.7496141  | 0.0065087  |
| H | -1.7782414 | 1.3175235  | 1.0282517  |
| H | -1.8413846 | 1.2512326  | -1.0281847 |
| N | -1.5108805 | -0.7144566 | 0.0554129  |
| H | -0.1034605 | 1.3339165  | -0.0553348 |
| H | -1.2432142 | -1.2446871 | -0.7672573 |
| H | -1.1925849 | -1.1906993 | 0.8929240  |
| H | 1.6176058  | -1.0108226 | -0.0154307 |
| N | 1.8439898  | -0.0182105 | -0.0503415 |
| H | 0.6431033  | 0.7991959  | -0.0524162 |
| H | 2.4235756  | 0.2055341  | 0.7580754  |
| H | 2.3916379  | 0.1546953  | -0.8927653 |

**TS0b** : H<sub>2</sub>O-bridged H<sub>2</sub>-release from BH<sub>3</sub>NH<sub>3</sub>

11

Energy = -159.7195261174

|   |            |            |            |
|---|------------|------------|------------|
| B | -1.1980168 | 0.7405998  | 0.0330614  |
| H | -1.5430598 | 1.1987241  | 1.0931894  |
| H | -1.8226220 | 1.0952004  | -0.9359494 |
| N | -0.8005805 | -0.7362078 | 0.0656160  |
| H | -0.0712006 | 1.5299220  | -0.1826794 |
| H | -1.1531774 | -1.2882150 | -0.7128348 |
| H | -1.0516204 | -1.2172535 | 0.9259581  |
| H | 0.6572231  | -0.5990984 | -0.0308557 |
| O | 1.5986470  | -0.0259573 | -0.1986964 |
| H | 0.6689964  | 0.9818400  | -0.1695034 |
| H | 2.0739919  | 0.0118335  | 0.6493047  |

**TS0** : H<sub>2</sub>-release from HCO<sub>2</sub>H and BH<sub>3</sub>NH<sub>3</sub>

13

Energy = -273.1440154306

|   |            |            |            |
|---|------------|------------|------------|
| B | -0.6033008 | -1.7181724 | 0.0863508  |
| H | -1.3648541 | -0.5646394 | -0.0152985 |
| H | -0.0984466 | -2.0286467 | -0.9464262 |
| H | -0.6492488 | -0.2856817 | -0.2860540 |
| C | 0.4031298  | 1.9036885  | 0.1021719  |
| O | 1.0152987  | 0.8070308  | -0.1399222 |
| O | -0.8097587 | 2.0344967  | 0.3800510  |
| H | 1.0305689  | 2.8224801  | 0.0483895  |
| H | -1.6001307 | -2.2873502 | 0.4173412  |
| H | 0.9609987  | -0.6115353 | 0.9717598  |
| H | 0.0210675  | -1.3478721 | 2.1566519  |
| H | 1.0979917  | -2.2489703 | 1.3038891  |
| N | 0.4331918  | -1.4760325 | 1.2308330  |

**TS1a** : CO<sub>2</sub> hydration with two H<sub>2</sub>O

9

Energy = -341.6308863358

|   |            |            |            |
|---|------------|------------|------------|
| C | 0.8605420  | -0.1976107 | -0.0104642 |
| O | 2.0382273  | -0.0508378 | 0.2772315  |
| O | 0.1222633  | -1.1569186 | -0.2970513 |
| O | 0.0703703  | 1.1120804  | -0.0655631 |
| H | 0.4870931  | 1.7796743  | 0.5092003  |
| H | -1.1475547 | 0.8236301  | 0.0908890  |
| O | -2.1026356 | 0.1292642  | 0.0649476  |
| H | -1.5504976 | -0.7045591 | -0.0780934 |
| H | -2.5218817 | 0.0653678  | 0.9429185  |

**TS1** : CO<sub>2</sub> hydration with three H<sub>2</sub>O

12

Energy = -418.1251015483

|   |            |            |            |
|---|------------|------------|------------|
| C | 1.3862145  | -0.0670404 | 0.0899236  |
| O | 2.5239577  | 0.2512710  | 0.3861896  |
| O | 0.7182643  | -1.0962393 | 0.0022157  |
| O | 0.5317316  | 1.1892651  | -0.3381820 |
| H | 1.0188322  | 1.9900742  | -0.0703501 |
| H | -0.6046802 | 1.2134150  | -0.0167770 |
| O | -1.8365294 | 1.1579639  | 0.2049987  |
| H | -2.0686711 | 0.1628583  | 0.0950616  |
| H | -2.0543280 | 1.4173454  | 1.1167626  |
| O | -1.9775940 | -1.3838212 | -0.1432477 |
| H | -0.9857938 | -1.4269693 | -0.1874288 |
| H | -2.2989688 | -1.6549529 | -1.0190233 |

**TS20** : S<sub>N</sub>2 replacement of NH<sub>3</sub> with CO<sub>2</sub>

11

Energy = -271.9305525599

|   |            |            |            |
|---|------------|------------|------------|
| B | 0.0018452  | -0.3629497 | -1.1125846 |
| H | -0.9223622 | 0.3932172  | -1.0664822 |
| H | 1.1199010  | 0.0538703  | -1.0348684 |
| H | -0.1883327 | -1.5304538 | -1.2830845 |
| N | 0.0054557  | 0.1720387  | -4.2667567 |

|   |            |            |            |
|---|------------|------------|------------|
| H | -0.9527425 | 0.2039729  | -4.6140036 |
| H | 0.4136878  | 1.0872835  | -4.4552122 |
| H | 0.5054073  | -0.4959391 | -4.8531559 |
| O | -0.0841753 | -0.6661055 | 1.1343263  |
| C | 0.0084644  | 0.1611756  | 1.9599566  |
| O | 0.0994600  | 0.9770508  | 2.7852973  |

**TS2a<sup>-</sup>** : S<sub>N</sub>2 replacement of NH<sub>3</sub> with HCO<sub>3</sub><sup>-</sup>  
13

Energy = -347.9681988902

|   |            |            |            |
|---|------------|------------|------------|
| B | -0.2119162 | -0.1874577 | -1.3923269 |
| H | -0.5969558 | 0.9494835  | -1.3383915 |
| H | 0.9571267  | -0.4323227 | -1.2614374 |
| H | -0.9860388 | -1.0714502 | -1.6544581 |
| O | -0.6041916 | -0.5206628 | 0.6148064  |
| C | -0.0258731 | 0.1885341  | 1.4844422  |
| O | 0.7880028  | 1.1250408  | 1.3593855  |
| O | -0.3906430 | -0.1738741 | 2.8012775  |
| H | 0.1023393  | 0.4304612  | 3.3853411  |
| N | 0.1348487  | 0.0786999  | -3.5998374 |
| H | -0.7263744 | 0.3190894  | -4.0903211 |
| H | 0.8067059  | 0.8208689  | -3.7939899 |
| H | 0.4961728  | -0.7722522 | -4.0303370 |

**TS2a** : S<sub>N</sub>2 replacement of NH<sub>3</sub> with H<sub>2</sub>O  
11

Energy = -159.7293756124

|   |            |            |            |
|---|------------|------------|------------|
| B | 0.0061516  | -0.0008029 | 0.1811804  |
| H | -0.6034673 | 1.0292626  | 0.0823165  |
| H | 1.2039597  | 0.0136698  | 0.0834155  |
| H | -0.5791309 | -1.0447557 | 0.0795256  |
| N | 0.0051344  | 0.0010285  | -2.2996575 |
| H | -0.9462672 | -0.0081478 | -2.6660243 |
| H | 0.4636292  | 0.8232381  | -2.6915339 |
| H | 0.4783977  | -0.8137404 | -2.6892254 |
| O | -0.0623358 | -0.0045716 | 2.1387674  |
| H | 0.4474976  | -0.7689003 | 2.4599178  |
| H | 0.4256431  | 0.7720601  | 2.4632330  |

**TS2b<sup>-</sup>** : S<sub>N</sub>2 replacement of NH<sub>3</sub> with HCO<sub>2</sub><sup>-</sup>  
12

Energy = -272.6783194499

|   |            |            |            |
|---|------------|------------|------------|
| B | -1.3248669 | 0.2097672  | 0.0712121  |
| H | -1.1177632 | -0.9050417 | -0.3328124 |
| H | -1.5025135 | 1.1105058  | -0.7065069 |
| H | -1.4220076 | 0.4143795  | 1.2526599  |
| H | 1.0513185  | -1.3232203 | -0.1506050 |
| C | 1.5196365  | -0.3243304 | 0.0096145  |
| O | 0.7064443  | 0.6456940  | 0.1272234  |
| O | 2.7739865  | -0.2641221 | 0.0547872  |
| N | -3.5140642 | -0.2323288 | 0.0058743  |
| H | -4.0789702 | 0.5458046  | 0.3456007  |
| H | -3.7468982 | -1.0436116 | 0.5782397  |
| H | -3.8256628 | -0.4366200 | -0.9434361 |

**TS2b** : S<sub>N</sub>2 replacement of NH<sub>3</sub> with Dbu  
35

Energy = -545.6433033570

|   |            |            |            |
|---|------------|------------|------------|
| C | -0.5314694 | -2.3471878 | -0.2348632 |
| C | -0.0373842 | -1.3484148 | 0.8342429  |
| C | -2.0561144 | -2.5012719 | -0.2910330 |
| H | -0.1434520 | -2.0357996 | -1.2134401 |
| H | -0.0904301 | -3.3274155 | -0.0175636 |
| H | -0.6112802 | -1.4840803 | 1.7601142  |
| H | 1.0129505  | -1.5399053 | 1.0544181  |
| C | -0.1074997 | 0.0888461  | 0.3762010  |
| C | -2.8272757 | -1.2034209 | -0.5599839 |
| H | -2.3992380 | -2.9112858 | 0.6701783  |
| H | -2.3153152 | -3.2414239 | -1.0583599 |
| N | -1.3517081 | 0.6604502  | 0.3024210  |
| N | 1.0106147  | 0.6758788  | 0.0645085  |
| C | -2.5831976 | -0.1156541 | 0.4986660  |
| H | -3.9008278 | -1.4299624 | -0.5723479 |
| H | -2.5731927 | -0.7995203 | -1.5489106 |
| C | -1.4971833 | 2.0272523  | -0.2109819 |
| C | 0.9796524  | 2.0623205  | -0.3983025 |
| H | -2.5851209 | -0.5649384 | 1.5004132  |
| H | -3.3987351 | 0.6113565  | 0.4750194  |
| H | -2.3776839 | 2.4710561  | 0.2643722  |
| H | -1.6765060 | 2.0111433  | -1.2964169 |
| C | -0.2404359 | 2.8271930  | 0.1091616  |
| H | 1.9069065  | 2.5422353  | -0.0638176 |
| H | 1.0022276  | 2.0750619  | -1.4981308 |
| H | -0.3013049 | 3.8188406  | -0.3513502 |
| H | -0.1654840 | 2.9627468  | 1.1950181  |
| B | 3.0647966  | -0.1092512 | -0.0243768 |
| H | 3.2647982  | 0.3186082  | 1.0823364  |
| H | 2.6905742  | -1.2404811 | -0.1795105 |
| H | 3.2251949  | 0.6094886  | -0.9770702 |
| N | 5.1324869  | -0.7634904 | -0.1632426 |
| H | 5.7823857  | 0.0169785  | -0.0691175 |
| H | 5.3672995  | -1.4380692 | 0.5647807  |
| H | 5.3280076  | -1.2098212 | -1.0592571 |

**TS2c<sup>-</sup>** : transfer hydrogenation of HCO<sub>3</sub><sup>-</sup>  
13

Energy = -347.9522490610

|   |            |            |            |
|---|------------|------------|------------|
| B | -1.6027663 | -0.9368126 | -0.4759288 |
| H | -1.5959992 | -1.9433001 | 0.1972621  |
| H | -1.7555672 | -1.0703242 | -1.6706276 |
| N | -2.2360906 | 0.2748470  | 0.1169592  |
| H | -2.5926883 | 0.2175281  | 1.0653887  |
| H | -0.7395631 | 1.1491224  | 0.1549794  |
| H | -2.8745186 | 0.8135558  | -0.4590691 |
| H | -0.2221266 | -0.6787247 | -0.4627360 |
| O | 0.2486168  | 1.3170874  | -0.0310384 |
| O | 1.7936507  | -0.1657032 | -0.8508989 |
| C | 0.8239019  | 0.0512016  | -0.0712891 |
| O | 0.9514230  | -0.3983224 | 1.2943252  |
| H | 1.4900224  | -1.2076755 | 1.2443810  |

**TS2** : transfer hydrogenation of CO<sub>2</sub>

11

Energy = -271.9623842486

|   |            |            |            |
|---|------------|------------|------------|
| B | -1.6351942 | 1.1070755  | 0.0001874  |
| H | -1.5903356 | 1.6663016  | -1.0485711 |
| H | -1.5906461 | 1.6660591  | 1.0490924  |
| N | -1.9372560 | -0.3472398 | -0.0001144 |
| H | -2.4102095 | -0.7023441 | -0.8314223 |
| H | -0.8304524 | -0.8696639 | -0.0000598 |
| H | -2.4103403 | -0.7028028 | 0.8309291  |
| H | 0.1483851  | 0.8907648  | 0.0007228  |
| C | 0.9536494  | 0.0572208  | -0.0000896 |
| O | 0.4579704  | -1.1197913 | -0.0002001 |
| O | 2.1220941  | 0.4306904  | -0.0005173 |

**TS3a** : HCO<sub>2</sub>H addition to B=N

11

Energy = -271.9798037064

|   |            |            |            |
|---|------------|------------|------------|
| B | 0.4722211  | 1.2324343  | 0.1583825  |
| H | 1.6231174  | 1.3316430  | -0.1515015 |
| H | -0.1423573 | -0.9118771 | 1.0239167  |
| C | -0.0491765 | -1.5675186 | -0.7397205 |
| O | -0.2725587 | -1.8071976 | 0.5395775  |
| O | 0.2557481  | -0.4676441 | -1.2001886 |
| H | -0.1628951 | -2.4595216 | -1.3687354 |
| N | 0.1612811  | 0.7292758  | 1.4735636  |
| H | -0.7179367 | 0.9686941  | 1.9200761  |
| H | 0.8985462  | 0.5887167  | 2.1565269  |
| H | -0.3813528 | 1.8164059  | -0.4421261 |

**TS3b** : cyclic addition of three H<sub>2</sub>O to B=N

15

Energy = -311.5476957272

|   |            |            |            |
|---|------------|------------|------------|
| O | 1.2438864  | -0.1839606 | 0.9535507  |
| H | 1.4219776  | -1.1021709 | 1.2164698  |
| B | -0.0181807 | 0.4322316  | 1.6489482  |
| H | 0.0957702  | 0.1497817  | 2.8254133  |
| H | 0.0352395  | 1.6226543  | 1.4242746  |
| N | -1.3018027 | -0.1644496 | 0.9893762  |
| H | -2.1236412 | 0.3425705  | 1.3242727  |
| H | -1.4632764 | -1.1390754 | 1.2517472  |
| H | -1.3337041 | -0.0621921 | -0.3470124 |
| O | 1.2284232  | -0.0339031 | -1.5191721 |
| H | 1.2840140  | -0.1087835 | -0.1338669 |
| H | 1.6289557  | 0.7906454  | -1.8400135 |
| O | -1.2815505 | 0.0022360  | -1.5460246 |
| H | 0.1766076  | 0.0458330  | -1.6563439 |
| H | -1.6547337 | 0.8630068  | -1.7959171 |

**TS3** : cyclic addition of two H<sub>2</sub>O to B=N

12

Energy = -235.0583426660

|   |           |            |            |
|---|-----------|------------|------------|
| O | 1.1885566 | 0.0236235  | -0.5245839 |
| H | 1.6698727 | -0.8158338 | -0.6098657 |

|   |            |            |            |
|---|------------|------------|------------|
| B | 0.8064337  | 0.3336605  | 1.0058588  |
| H | 1.5648308  | -0.3396901 | 1.6687995  |
| H | 0.9548574  | 1.5296057  | 1.1321866  |
| N | -0.6949011 | -0.0455344 | 1.1632655  |
| H | -1.2255267 | 0.6501773  | 1.6837513  |
| H | -0.8559998 | -0.9428548 | 1.6185135  |
| H | -1.1549610 | -0.1098214 | -0.1563943 |
| O | -1.1225561 | -0.1977633 | -1.3110296 |
| H | 0.2439912  | -0.0656936 | -1.0779909 |
| H | -1.4920554 | 0.6191001  | -1.6861915 |

**TS4a** : CO<sub>2</sub> hydrogenation with HOBH<sub>2</sub>NH<sub>3</sub>

12

Energy = -347.2906460178

|   |            |            |            |
|---|------------|------------|------------|
| B | -1.2430143 | 0.2821559  | -0.5198741 |
| H | -1.2671077 | 0.4068615  | -1.7203195 |
| N | -1.4517595 | -1.2340725 | -0.0861088 |
| H | -2.2214921 | -1.6847939 | -0.5860535 |
| H | -0.6024988 | -1.7811448 | -0.2665615 |
| H | -1.6577775 | -1.3162951 | 0.9131924  |
| H | 0.0383149  | 0.4426605  | -0.2021184 |
| C | 1.4386934  | 0.0401951  | 0.0232683  |
| O | 1.4907599  | -1.1572792 | -0.1233135 |
| O | 2.0187372  | 1.0641124  | 0.2686878  |
| O | -2.0750544 | 1.1026618  | 0.2877200  |
| H | -2.2288537 | 1.9684128  | -0.1181205 |

**TS4b** : CO<sub>2</sub> hydrogenation with MeOBH<sub>2</sub>NH<sub>3</sub>

15

Energy = -386.6125443858

|   |            |            |            |
|---|------------|------------|------------|
| B | -0.8646816 | -0.4962636 | -0.4452136 |
| H | -0.9820719 | -0.5227207 | -1.6481614 |
| N | -0.4378182 | -1.9047948 | 0.1463600  |
| H | -0.8992368 | -2.6895450 | -0.3185317 |
| H | 0.5768369  | -2.0364919 | 0.0457613  |
| H | -0.6566824 | -1.9756625 | 1.1436389  |
| H | 0.2530187  | 0.2084155  | -0.2515422 |
| C | 1.7018811  | 0.4013151  | -0.0765146 |
| O | 2.2047121  | -0.6970908 | -0.0262138 |
| O | 1.8611189  | 1.5928255  | -0.0503154 |
| O | -1.9221977 | 0.0230817  | 0.3354490  |
| C | -2.5789904 | 1.1943227  | -0.1640963 |
| H | -3.4641386 | 1.3684159  | 0.4526542  |
| H | -1.9174883 | 2.0676698  | -0.0984483 |
| H | -2.8818741 | 1.0537783  | -1.2096675 |

**TS4c** : CO<sub>2</sub> hydrogenation with BH<sub>3</sub>NHMe<sub>2</sub>

17

Energy = -350.6174272048

|   |            |            |            |
|---|------------|------------|------------|
| B | -0.6644311 | 1.5070918  | -0.0088142 |
| H | -0.5035005 | 2.0370674  | -1.0613870 |
| H | -0.5088870 | 2.0507996  | 1.0375453  |
| N | -1.2432530 | 0.1404399  | -0.0012576 |
| H | -0.2173863 | -0.5280298 | 0.0068273  |
| H | 1.0849442  | 0.9711979  | -0.0013134 |

|   |            |            |            |
|---|------------|------------|------------|
| C | 1.7070170  | -0.0031793 | 0.0081530  |
| O | 0.9819311  | -1.0569475 | 0.0143453  |
| O | 2.9273965  | 0.1202315  | 0.0106921  |
| C | -1.9587300 | -0.3006208 | -1.2399670 |
| H | -1.3782864 | 0.0063533  | -2.1101056 |
| H | -2.0606154 | -1.3877346 | -1.2233533 |
| H | -2.9480136 | 0.1601174  | -1.2722250 |
| C | -1.9666719 | -0.2835219 | 1.2388277  |
| H | -1.3908720 | 0.0338232  | 2.1083376  |
| H | -2.9555072 | 0.1788703  | 1.2594097  |
| H | -2.0699495 | -1.3706205 | 1.2356948  |

**TS4<sup>-</sup>** : S<sub>N</sub>2 replacement of NH<sub>3</sub> with HCO<sub>2</sub><sup>-</sup>  
13

Energy = -347.9960022732

|   |            |            |            |
|---|------------|------------|------------|
| B | -1.0396905 | 0.3229355  | -0.1089298 |
| H | -0.7286658 | -0.6268678 | -0.7689524 |
| O | -1.3223445 | 0.0808812  | 1.2323130  |
| H | -1.1206643 | 1.4284667  | -0.5667458 |
| H | -1.5946112 | 0.8887859  | 1.6927405  |
| H | -4.0416522 | 0.5926248  | -0.4927026 |
| N | -3.3914975 | -0.0428655 | -0.9556077 |
| H | -3.6634628 | -0.9876613 | -0.6840394 |
| H | -3.5655686 | 0.0373578  | -1.9578425 |
| O | 1.3120212  | 0.7651713  | 0.0935843  |
| C | 2.0342838  | -0.2397694 | -0.1671550 |
| H | 1.4913456  | -1.1417331 | -0.5436495 |
| O | 3.2873090  | -0.3354694 | -0.0530308 |

**TS4** : S<sub>N</sub>2 replacement of NH<sub>3</sub> with H<sub>2</sub>O  
12

Energy = -235.0521851088

|   |            |            |            |
|---|------------|------------|------------|
| B | -0.0469257 | 0.4237462  | 0.1656374  |
| H | -1.1948112 | 0.7622466  | 0.1373341  |
| H | 0.8541294  | 1.2112890  | 0.1819089  |
| O | 0.3059120  | -0.9049988 | 0.0391467  |
| H | -0.4629902 | -1.4936869 | -0.0183068 |
| O | -0.1201090 | 0.5124425  | 2.5744656  |
| H | 0.1475178  | -0.4086774 | 2.7329813  |
| H | 0.6708080  | 1.0299962  | 2.8004119  |
| N | -0.0821242 | 0.5926214  | -2.6575927 |
| H | -0.9559963 | 0.0896763  | -2.8148050 |
| H | 0.1312809  | 1.0719518  | -3.5338225 |
| H | 0.6378123  | -0.1196072 | -2.5363662 |

**TS5a<sup>-</sup>** : S<sub>N</sub>2 replacement of HCO<sub>2</sub><sup>-</sup> with H<sub>2</sub>O  
12

Energy = -367.8745094730

|   |            |            |            |
|---|------------|------------|------------|
| B | -1.2210830 | 0.1886245  | -0.3574740 |
| H | -1.0326371 | -0.9511266 | -0.6718806 |
| O | -1.1849351 | 0.4638726  | 0.9988111  |
| H | -1.3058821 | 1.0728868  | -1.1623605 |
| H | -1.2755820 | 1.4108896  | 1.1848935  |
| H | -3.6422684 | -0.9079551 | 0.0207911  |
| O | -3.4710774 | -0.2061403 | -0.6298248 |

|   |            |            |            |
|---|------------|------------|------------|
| H | -3.9228349 | 0.5727745  | -0.2632126 |
| O | 1.4300855  | 0.4653687  | -0.7901815 |
| C | 1.9549557  | -0.3523983 | 0.0150604  |
| H | 1.2659871  | -1.1174564 | 0.4517639  |
| O | 3.1627816  | -0.4057268 | 0.3843722  |

**TS5a** : H<sub>2</sub>-release from BH<sub>2</sub>OH and three H<sub>2</sub>O  
14

Energy = -331.4177858025

|   |            |            |            |
|---|------------|------------|------------|
| B | 1.1339807  | 0.3808125  | -0.1818816 |
| H | 0.4623696  | -0.2050322 | -1.2206096 |
| H | 0.9137200  | 1.5714868  | -0.3150669 |
| O | 0.5634476  | -0.1066981 | 1.0790064  |
| H | -0.5871897 | -0.1324688 | -1.3238698 |
| H | 0.8470014  | -1.0193297 | 1.2538068  |
| O | -1.7507858 | -0.0179804 | -1.3611022 |
| H | -2.1206670 | -0.8284074 | -1.7572304 |
| H | -2.0243271 | 0.0159739  | -0.3379686 |
| O | -2.0475007 | 0.0536276  | 1.1316518  |
| H | -2.3574027 | 0.9038041  | 1.4851032  |
| H | -1.0415174 | 0.0261904  | 1.2670403  |
| O | 2.4982204  | -0.0685901 | -0.3282513 |
| H | 2.9262896  | 0.3408167  | -1.0951470 |

**TS5b<sup>-</sup>** : H<sub>2</sub>-release: BH<sub>2</sub>(OH)<sub>2</sub><sup>-</sup> and HCO<sub>2</sub>H  
12

Energy = -367.8859637618

|   |            |            |            |
|---|------------|------------|------------|
| B | -0.4670910 | -1.8250013 | 0.0910811  |
| H | -1.0456777 | -0.4781673 | -0.0137410 |
| O | 0.1813208  | -2.1183419 | -1.1455412 |
| H | 1.0535357  | -1.6937012 | -1.1860531 |
| H | -0.5114526 | 0.2243498  | -0.3180319 |
| C | 0.2070887  | 2.2715127  | -0.1186850 |
| O | 0.2627184  | 1.1901734  | -0.8252019 |
| O | -0.4877802 | 2.4764408  | 0.8877525  |
| H | 0.8727515  | 3.0753254  | -0.4992029 |
| H | -1.5304797 | -2.4023022 | 0.2142120  |
| O | 0.4172927  | -1.7837285 | 1.2161373  |
| H | -0.0678385 | -1.6891966 | 2.0493802  |

**TS5b** : H<sub>2</sub>-release from BH<sub>2</sub>OH and two H<sub>2</sub>O  
11

Energy = -254.9235852237

|   |            |            |            |
|---|------------|------------|------------|
| B | -0.7787323 | -0.2101105 | 0.5470906  |
| H | 0.0005648  | 0.8125575  | 1.0039873  |
| O | 0.1214897  | -1.0312957 | -0.3256030 |
| H | 0.9956933  | 0.8214949  | 0.6483938  |
| H | 0.1815966  | -1.9442463 | -0.0060990 |
| H | -1.1265316 | -0.7752119 | 1.5602624  |
| O | 2.0106161  | 0.4809123  | 0.1369099  |
| H | 2.2482247  | 1.1150215  | -0.5649183 |
| H | 1.4770167  | -0.3122918 | -0.2857504 |
| O | -1.8841761 | 0.3825742  | -0.1491072 |
| H | -1.6171463 | 0.7405532  | -1.0106943 |

**TS5ca** : H<sub>2</sub>-release from BH<sub>2</sub>NH<sub>2</sub> and two H<sub>2</sub>O  
12

Energy = -235.0270592557

|   |            |            |            |
|---|------------|------------|------------|
| O | 0.6913394  | -1.1127874 | -0.4361376 |
| H | 1.0295036  | -1.6311901 | 0.3125175  |
| B | 1.4354128  | 0.2045143  | -0.4957430 |
| H | 2.0738298  | 0.3420909  | -1.5203391 |
| H | 0.4319096  | 1.1197864  | -0.6856546 |
| N | 2.2118436  | 0.4636290  | 0.7419903  |
| H | 1.6778979  | 0.6079250  | 1.5966719  |
| H | 2.9102365  | 1.1990055  | 0.6760339  |
| H | -0.5638716 | 0.7646213  | -0.5493642 |
| O | -1.4574274 | 0.0269793  | -0.3075229 |
| H | -0.7252118 | -0.7478845 | -0.3257017 |
| H | -2.0187250 | -0.0498600 | -1.1009547 |

**TS5cn** : H<sub>2</sub>-release: BH<sub>3</sub>OH<sup>-</sup> and NH<sub>4</sub><sup>+</sup>.OH<sub>2</sub>  
14

Energy = -236.2265672529

|   |            |            |            |
|---|------------|------------|------------|
| B | -0.3414341 | -1.5046605 | 0.9873379  |
| H | 0.2960237  | -0.4953978 | 1.9936378  |
| O | 0.2967525  | -1.3964166 | -0.2690102 |
| H | -1.4827318 | -1.1341358 | 0.9985165  |
| H | 0.0002049  | -2.3906467 | 1.7291869  |
| H | 1.1625084  | -1.8318371 | -0.2950095 |
| H | 0.0825286  | -0.0156456 | -1.3502169 |
| O | -0.0081935 | 0.8213003  | -1.8721545 |
| H | -0.9004053 | 0.7839798  | -2.2519265 |
| H | 0.1501577  | 0.2500515  | 1.6620852  |
| N | 0.0128157  | 1.8516181  | 1.0388250  |
| H | 0.8103108  | 2.4494422  | 1.2539978  |
| H | -0.8244287 | 2.3339229  | 1.3643938  |
| H | -0.0495856 | 1.7619631  | 0.0186291  |

**TS5c** : H<sub>2</sub>-release from BH<sub>2</sub>NH<sub>2</sub> and three H<sub>2</sub>O  
15

Energy = -311.5189617652

|   |            |            |            |
|---|------------|------------|------------|
| O | 0.6844773  | -1.1617268 | -0.5592209 |
| H | 1.2496263  | -1.8494859 | -0.1706819 |
| B | 1.4440827  | 0.1270216  | -0.5654772 |
| H | 2.3199004  | 0.1906010  | -1.4128861 |
| H | 0.5417643  | 0.9655166  | -1.1317115 |
| N | 1.9187262  | 0.5347407  | 0.7845136  |
| H | 1.2069756  | 0.6525687  | 1.5034537  |
| H | 2.5314883  | 1.3462489  | 0.8090262  |
| H | -0.3887396 | 1.1618787  | -0.7395572 |
| O | -1.6177736 | -0.9889858 | 0.6065345  |
| H | -0.7196543 | -1.2013999 | 0.1607848  |
| H | -2.2787438 | -1.5722685 | 0.1981931  |
| O | -1.4696052 | 1.3489934  | -0.2614794 |
| H | -1.7089198 | 0.3792459  | 0.1064054  |
| H | -2.0763727 | 1.5602593  | -0.9943389 |

**TS5d** : H<sub>2</sub>-release:HOBH<sub>2</sub>NH<sub>3</sub> and HCO<sub>2</sub>H  
14

Energy = -348.4631191798

|   |            |            |            |
|---|------------|------------|------------|
| B | -0.5064197 | -1.8972402 | 0.0419059  |
| H | -1.4028637 | -0.6407669 | -0.0318711 |
| O | 0.1365032  | -2.1105235 | -1.1622441 |
| H | 0.8933594  | -1.5204842 | -1.3191049 |
| H | -0.7795611 | -0.1082243 | -0.1396629 |
| C | 0.4038668  | 1.9926267  | 0.0786045  |
| O | 0.6073469  | 0.7817035  | -0.3048935 |
| O | -0.6592302 | 2.4671805  | 0.5177050  |
| H | 1.2914358  | 2.6575986  | -0.0089727 |
| H | -1.4345165 | -2.5926507 | 0.3162898  |
| H | 0.9005099  | -0.6101372 | 1.0262085  |
| H | -0.1145105 | -1.3493895 | 2.1231302  |
| H | 1.1107052  | -2.2117466 | 1.4497465  |
| N | 0.4086750  | -1.4920129 | 1.2557408  |

**TS6a** : H<sub>2</sub>-release from BH(OH)<sub>2</sub> and two H<sub>2</sub>O  
12

Energy = -330.2455505490

|   |            |            |            |
|---|------------|------------|------------|
| B | -0.4364114 | 0.1389099  | -0.0229420 |
| H | 0.3093334  | 1.2821649  | 0.0882655  |
| O | 0.4071209  | -0.9987217 | 0.4321429  |
| H | 1.3539784  | 1.0603991  | 0.0514657  |
| H | 0.2253010  | -1.2075823 | 1.3633609  |
| O | 2.3810967  | 0.4933520  | 0.1672872  |
| H | 2.8433410  | 0.4751152  | -0.6916816 |
| H | 1.8563168  | -0.3939175 | 0.2841370  |
| O | -0.6647251 | 0.1200199  | -1.4451248 |
| H | -1.1993631 | -0.6543171 | -1.6872999 |
| O | -1.5565114 | 0.2801101  | 0.8652970  |
| H | -2.1765980 | 0.9488244  | 0.5364928  |

**TS6** : H<sub>2</sub>-release from BH(OH)<sub>2</sub> and three H<sub>2</sub>O  
15

Energy = -406.7399537750

|   |            |            |            |
|---|------------|------------|------------|
| B | 1.0056830  | 0.1305802  | -0.1147786 |
| H | 0.3770714  | -0.1831109 | -1.2890441 |
| O | 0.4098254  | -0.7138972 | 0.9332544  |
| H | -0.7049820 | -0.1826998 | -1.4195439 |
| H | 0.6387485  | -1.6478205 | 0.8020180  |
| O | -1.8481862 | -0.1452180 | -1.4621957 |
| H | -2.1613145 | -0.9141115 | -1.9729403 |
| H | -2.1425099 | -0.2524724 | -0.4437793 |
| O | -2.1636705 | -0.2300298 | 1.0134801  |
| H | -2.7341053 | -0.9070694 | 1.4132140  |
| H | -1.2045508 | -0.5170365 | 1.1662074  |
| O | 2.3847414  | -0.2107841 | -0.3350646 |
| H | 2.7798152  | 0.3589298  | -1.0129964 |
| O | 0.7936772  | 1.5347321  | 0.1356882  |
| H | -0.1176227 | 1.7401837  | 0.3936984  |

**TS7** : hydride from HCO<sub>2</sub>BH<sub>2</sub>OH<sup>-</sup> to CO<sub>2</sub>  
12

Energy = -480.1142724652

|   |            |           |           |
|---|------------|-----------|-----------|
| B | -0.2305491 | 0.8770976 | 0.9317782 |
|---|------------|-----------|-----------|



|   |            |            |            |
|---|------------|------------|------------|
| H | -0.3160855 | 1.2391396  | 2.0858555  |
| O | -0.2189802 | 1.9416749  | -0.0196866 |
| O | -1.2516200 | -0.2298439 | 0.7047252  |
| H | 0.9055778  | 0.2292330  | 0.8373040  |
| H | 0.2436254  | 1.6634540  | -0.8305928 |
| C | -2.0240037 | -0.2849583 | -0.3584399 |
| O | -2.8178704 | -1.2005629 | -0.5606976 |
| H | -1.9177425 | 0.5606868  | -1.0557010 |
| C | 1.9602840  | -0.3441145 | -0.1288572 |
| O | 2.5552348  | -1.1392432 | 0.5423898  |
| O | 1.7918924  | 0.2171747  | -1.1781827 |

**TS8<sup>-</sup>** : hydride from  $\text{BH}_2(\text{OH})_2^-$  to  $\text{CO}_2$   
10

Energy = -366.6994415390

|   |            |            |            |
|---|------------|------------|------------|
| B | -1.4347463 | -0.0269955 | 0.7327671  |
| H | -1.7887509 | 0.1516759  | 1.8968161  |
| H | -0.1722515 | 0.2188795  | 0.6707929  |
| O | -2.1543235 | 0.9450932  | -0.1157558 |
| H | -1.8767571 | 0.8560296  | -1.0411082 |
| C | 1.3624538  | -0.0779804 | -0.1798402 |
| O | 2.0652490  | 0.6838923  | 0.3969292  |
| O | 1.0467356  | -0.9079765 | -0.9681367 |
| O | -1.6218944 | -1.4424330 | 0.3663260  |
| H | -1.0332966 | -1.6639844 | -0.3732944 |

**TS9<sup>-</sup>** : hydride from  $\text{BH}(\text{OH})_3^-$  to  $\text{CO}_2$   
11

Energy = -442.0204700882

|   |            |            |            |
|---|------------|------------|------------|
| B | -1.1429054 | 0.1395943  | 0.1094778  |
| H | 0.1421637  | 0.2048432  | 0.0384536  |
| O | -1.5622800 | 1.5165229  | 0.3953210  |
| H | -2.5044631 | 1.6062296  | 0.1761005  |
| C | 1.8029880  | -0.2219724 | -0.0196358 |
| O | 2.2199515  | 0.5730593  | -0.7995998 |
| O | 1.8462783  | -1.1354326 | 0.7390638  |
| O | -1.6577049 | -0.3983824 | -1.1627579 |
| H | -1.3449283 | 0.1494777  | -1.8989979 |
| O | -1.5126122 | -0.7566468 | 1.2055763  |
| H | -1.1706894 | -1.6465509 | 1.0294625  |

**aTS1<sup>-</sup>** : hydride from  $\text{BH}_4^-$  to  $\text{CO}_2$   
8

Energy = -216.0723164995

|   |            |            |            |
|---|------------|------------|------------|
| B | -2.2519746 | -0.2576793 | 0.0197277  |
| H | -2.4373911 | -0.3044514 | 1.2161629  |
| H | -2.4731109 | -1.2857440 | -0.5819361 |
| H | -2.6317904 | 0.7591350  | -0.5194576 |
| H | -0.9293402 | -0.1500012 | -0.0744471 |
| C | 0.4379496  | -0.0065558 | -0.0425386 |
| O | 0.6913197  | 1.0929854  | 0.3980876  |
| O | 0.9231898  | -1.0306364 | -0.4713039 |

**aTS1** :  $\text{H}_2$ -release from  $\text{BH}_4^-$  and  $\text{H}_5\text{O}_2^+$   
12

Energy = -180.7861950137

|   |            |            |            |
|---|------------|------------|------------|
| B | -1.5234407 | -0.1477017 | -1.0340667 |
| H | -0.7084587 | 0.5075441  | -1.7981617 |
| H | -1.2776793 | -1.3300074 | -1.1047170 |
| H | 0.1184013  | 0.2056639  | -1.3861821 |
| H | -2.5391260 | 0.1733771  | -1.6123793 |
| O | 1.3715382  | -0.0116074 | -1.0686968 |
| H | 1.8959691  | 0.7734201  | -1.3079402 |
| H | 1.3959558  | -0.0902270 | -0.0546320 |
| O | 1.2561543  | -0.2111383 | 1.5394546  |
| H | 1.5301952  | -1.0772102 | 1.8862505  |
| H | 0.3083947  | -0.1438974 | 1.7497361  |
| H | -1.4426246 | 0.3077197  | 0.0867062  |

**aTS2<sup>-</sup>** :  $\text{S}_{\text{N}}2$  replacement of  $\text{HCO}_2^-$  with  $\text{H}_2\text{O}$   
11

Energy = -292.5511162673

|   |            |            |            |
|---|------------|------------|------------|
| B | -1.4595878 | 0.2071790  | 0.0762117  |
| H | -1.2606664 | -0.3255186 | -0.9805226 |
| H | -1.2593327 | -0.4010282 | 1.0913945  |
| H | -1.6473069 | 1.3918174  | 0.1221750  |
| H | -3.5077076 | -1.1593524 | -0.1775182 |
| O | -3.4316513 | -0.2076988 | 0.0096065  |
| H | -3.7842746 | -0.1065017 | 0.9106752  |
| O | 0.8553485  | 0.7190262  | 0.1031733  |
| C | 1.5373897  | -0.3409898 | -0.0098756 |
| H | 0.9544717  | -1.2724365 | -0.2130195 |
| O | 2.7896529  | -0.4580619 | 0.0793611  |

**aTS3<sup>-</sup>** : hydride from  $\text{BH}_3\text{OH}^-$  to  $\text{CO}_2$   
9

Energy = -291.3812104879

|   |            |            |            |
|---|------------|------------|------------|
| B | -1.5401674 | -0.8158710 | 0.2413894  |
| H | -1.5075302 | -0.9998963 | 1.4610558  |
| H | -1.9789607 | -1.7940989 | -0.3569576 |
| H | -0.3062228 | -0.7382249 | -0.1131326 |
| O | -2.2654941 | 0.3934391  | -0.1838336 |
| H | -1.8980648 | 1.1687696  | 0.2665192  |
| C | 1.1332597  | 0.1671802  | 0.0844673  |
| O | 0.7540988  | 1.2904161  | -0.0082469 |
| O | 1.9311713  | -0.7046241 | 0.2294815  |

**aTS4a** :  $\text{H}_2$ -release from  $\text{BH}_3$  and two  $\text{H}_2\text{O}$   
10

Energy = -179.6057091388

|   |            |            |            |
|---|------------|------------|------------|
| B | -1.2254521 | 0.6469949  | 0.0040645  |
| H | -0.2053807 | 1.4435283  | 0.3619662  |
| H | -1.4930444 | 1.0344835  | -1.1115724 |
| O | -0.7913390 | -0.7766578 | -0.0124470 |
| H | 0.6753775  | 0.9524016  | 0.1695868  |
| H | -0.9704118 | -1.2025011 | 0.8399240  |
| H | -2.0355593 | 0.9159116  | 0.8629985  |
| O | 1.5484883  | 0.1216804  | 0.0042502  |
| H | 1.9860858  | 0.2819776  | -0.8521691 |
| H | 0.8143387  | -0.5842850 | -0.1319921 |

**aTS4b** : H<sub>2</sub>-release from BH<sub>3</sub> and one H<sub>2</sub>O

7

Energy = -103.0984294935

|   |            |            |            |
|---|------------|------------|------------|
| B | -0.1029653 | 0.5687326  | -0.0502280 |
| H | 0.1217294  | 1.1001648  | 1.1425602  |
| H | -0.1118820 | 1.4728309  | -0.8332552 |
| O | 1.2833459  | -0.2153936 | -0.1170235 |
| H | 0.9238175  | 0.4948446  | 0.8931019  |
| H | 1.1455956  | -1.1418431 | 0.1463395  |
| H | -1.0573132 | -0.1439310 | 0.0574312  |

|   |            |            |            |
|---|------------|------------|------------|
| H | -1.2893631 | -1.3706197 | -1.0268767 |
| O | -1.3722249 | 0.1665042  | 0.5640858  |
| H | 0.3075958  | 0.2245231  | -1.3896252 |
| H | -1.7397157 | 1.0441200  | 0.7478301  |
| H | -2.5184543 | 0.2263623  | -1.3919649 |
| O | 1.5107469  | 0.0130761  | -1.1090341 |
| H | 2.0142380  | 0.8161199  | -1.3354725 |
| H | 1.4951501  | -0.0698047 | -0.0723420 |
| O | 1.0937654  | -0.1573997 | 1.4026529  |
| H | 1.2092690  | -1.0508905 | 1.7657332  |
| H | 0.1020114  | -0.0434358 | 1.2330136  |

**aTS4** : H<sub>2</sub>-release from BH<sub>3</sub> and three H<sub>2</sub>O

13

Energy = -256.1005394798

|   |            |            |            |
|---|------------|------------|------------|
| B | -1.5150319 | -0.1944183 | -0.8533925 |
| H | -0.6242767 | 0.4670542  | -1.6120299 |
